# Supplementary material for: PermDroid a framework developed using proposed feature selection approach and machine learning techniques for Android malware detection
Source: Springer Nature journal article supplement (doi:10.1038/s41598-024-60982-y), 2024-05-10
Supplement: 41598_2024_60982_MOESM1_ESM.pdf [file 41598_2024_60982_MOESM1_ESM.pdf]

Table S1: Accuracy measured by using  $t$ -test.

| ID  | GD   |      | GDM   |        | GDA  |      | NM   |       | LM   |      | DNN |       | BTE |      | MVE  |      | NDTF |      |
|-----|------|------|-------|--------|------|------|------|-------|------|------|-----|-------|-----|------|------|------|------|------|
|     | EF   | SF   | EF    | SF     | EF   | SF   | EF   | SF    | EF   | SF   | EF  | SF    | EF  | SF   | EF   | SF   | EF   | SF   |
| D1  | 52.4 | 54.5 | 46    | 51.6   | 44.6 | 52.4 | 54   | 55    | 52.4 | 63.1 | 55  | 59.5  | 55  | 55   | 49.2 | 59.2 | 54.5 | 59.6 |
| D2  | 53   | 59.4 | 49.51 | 54.430 | 45   | 53   | 43   | 49.61 | 52   | 59.6 | 59  | 63.3  | 56  | 56   | 54   | 61   | 53   | 59   |
| D3  | 54   | 59   | 46    | 49.92  | 51   | 56   | 50   | 55    | 52   | 56   | 59  | 64.9  | 46  | 50   | 52   | 56   | 56   | 60   |
| D4  | 53   | 55   | 46    | 49     | 52   | 55   | 51   | 56    | 50   | 53   | 56  | 59.1  | 46  | 50   | 51   | 53   | 54   | 60   |
| D5  | 50   | 53   | 42    | 46.9   | 52   | 56   | 45   | 52    | 50.3 | 56.5 | 54  | 59.1  | 46  | 52   | 53   | 54   | 55   | 61   |
| D6  | 50   | 53   | 51    | 59.9   | 46   | 52   | 45   | 54    | 50   | 54   | 52  | 61.1  | 46  | 49.9 | 51   | 54   | 53   | 55   |
| D7  | 44   | 49   | 53    | 59.9   | 51   | 56   | 40   | 45    | 51   | 59   | 50  | 55    | 42  | 46   | 50   | 53   | 52   | 55   |
| D8  | 44   | 53   | 46    | 49.9   | 52   | 59   | 54   | 59    | 53   | 59   | 55  | 61.1  | 42  | 45   | 52   | 55   | 56   | 60.1 |
| D9  | 44   | 52   | 44    | 49.9   | 50   | 54   | 51   | 54    | 53   | 55   | 55  | 65    | 51  | 56   | 53   | 60   | 59   | 66   |
| D10 | 44   | 52   | 42    | 49.9   | 54   | 59   | 51   | 59    | 42   | 56   | 54  | 64.4  | 46  | 55   | 51   | 59   | 55   | 64   |
| D11 | 46   | 59   | 46    | 49.9   | 51   | 52   | 40   | 55    | 52   | 62   | 49  | 54.1  | 41  | 52   | 54   | 62   | 56   | 66   |
| D12 | 45   | 59   | 44    | 52.3   | 41   | 55   | 40   | 54    | 42   | 56   | 49  | 55.1  | 42  | 50   | 52   | 56   | 46   | 60.0 |
| D13 | 43   | 59   | 56    | 69.2   | 41   | 56   | 46   | 55    | 42   | 56   | 49  | 64.1  | 45  | 53   | 50   | 56   | 51   | 62   |
| D14 | 54   | 52   | 46    | 59.95  | 44   | 52   | 55   | 60    | 54   | 61   | 45  | 64.1  | 42  | 50   | 54   | 60   | 51   | 62.0 |
| D15 | 51   | 56   | 56    | 59.91  | 51   | 61   | 40   | 55    | 52   | 56   | 51  | 64.31 | 56  | 60   | 54   | 56   | 55   | 65   |
| D16 | 44   | 59   | 46    | 49.9   | 51   | 56   | 40   | 57.5  | 55.1 | 66.4 | 51  | 62.1  | 46  | 50   | 52   | 56   | 51   | 62   |
| D17 | 44   | 58   | 46    | 52.9   | 50   | 61   | 50   | 55    | 42   | 56   | 49  | 63    | 46  | 54   | 42   | 61   | 46   | 62   |
| D18 | 44   | 52   | 46    | 52.4   | 44   | 56   | 55   | 61    | 52   | 60   | 59  | 64    | 56  | 60   | 52   | 61   | 56   | 65   |
| D19 | 41   | 59   | 56    | 59.94  | 51   | 59   | 46   | 55    | 50   | 56   | 52  | 62.1  | 41  | 52   | 50   | 55   | 52   | 66   |
| D20 | 44   | 55   | 54    | 61.6   | 51   | 62   | 40   | 52    | 50   | 59   | 45  | 62.3  | 54  | 60   | 50   | 59   | 52   | 61   |
| D21 | 54   | 61   | 42    | 59.9   | 50   | 55   | 45   | 52    | 50   | 59   | 51  | 61.2  | 56  | 59   | 41   | 56   | 46   | 55   |
| D22 | 44   | 52   | 44    | 59     | 51   | 56   | 42   | 50    | 51   | 55   | 51  | 62    | 56  | 62   | 52   | 61   | 56   | 63.9 |
| D23 | 44   | 55   | 46    | 59     | 51   | 58   | 45   | 59    | 42   | 56   | 49  | 60    | 40  | 55   | 42   | 56   | 46   | 63   |
| D24 | 54   | 58   | 46    | 59.9   | 51   | 56   | 50   | 59    | 45   | 56   | 59  | 62.3  | 46  | 55   | 52   | 62   | 56   | 62   |
| D25 | 45   | 59   | 46    | 55     | 55   | 61   | 49   | 52    | 50   | 59   | 52  | 62    | 51  | 62.8 | 52   | 61   | 56   | 61.5 |
| D26 | 40   | 52   | 46    | 55     | 50   | 61   | 50   | 59    | 52   | 56   | 59  | 64    | 56  | 60   | 52   | 61   | 58   | 62.5 |
| D27 | 44   | 59   | 46    | 51.2   | 50   | 55   | 50   | 55    | 50   | 55   | 52  | 61.5  | 50  | 59   | 53   | 61   | 57.8 | 62.6 |
| D28 | 54   | 59   | 51    | 59.8   | 51   | 60.1 | 50   | 61.5  | 52   | 60.2 | 59  | 63.7  | 56  | 59   | 53   | 61.5 | 59   | 63.5 |
| D29 | 44   | 52.6 | 41    | 52.2   | 41   | 56.4 | 50.4 | 55.5  | 52.5 | 59.6 | 51  | 66.1  | 46  | 50.5 | 55.9 | 60.9 | 51   | 66.4 |
| D30 | 51   | 59   | 52    | 59.9   | 51   | 58   | 50   | 55    | 52   | 56   | 59  | 64.1  | 53  | 58   | 52   | 56   | 56   | 62   |

Table S2: F-Measure measured by using  $t$ -test.

| ID  | GD   |       | GDM   |      | GDA  |      | NM   |      | LM   |       | DNN  |       | BTE   |       | MVE   |       | NDTF  |       |
|-----|------|-------|-------|------|------|------|------|------|------|-------|------|-------|-------|-------|-------|-------|-------|-------|
|     | EF   | SF    | EF    | SF   | EF   | SF   | EF   | SF   | EF   | SF    | EF   | SF    | EF    | SF    | EF    | SF    | EF    | SF    |
| D1  | 0.49 | 0.56  | 0.41  | 0.59 | 0.46 | 0.59 | 0.50 | 0.53 | 0.49 | 0.55  | 0.45 | 0.52  | 0.49  | 0.52  | 0.42  | 0.55  | 0.49  | 0.54  |
| D2  | 0.42 | 0.56  | 0.49  | 0.51 | 0.49 | 0.53 | 0.46 | 0.55 | 0.44 | 0.60  | 0.49 | 0.552 | 0.45  | 0.59  | 0.45  | 0.54  | 0.45  | 0.594 |
| D3  | 0.44 | 0.59  | 0.44  | 0.59 | 0.41 | 0.52 | 0.45 | 0.50 | 0.45 | 0.56  | 0.49 | 0.55  | 0.46  | 0.55  | 0.41  | 0.59  | 0.46  | 0.54  |
| D4  | 0.42 | 0.54  | 0.462 | 0.59 | 0.42 | 0.54 | 0.41 | 0.56 | 0.40 | 0.56  | 0.42 | 0.53  | 0.44  | 0.53  | 0.45  | 0.53  | 0.45  | 0.59  |
| D5  | 0.40 | 0.52  | 0.42  | 0.50 | 0.42 | 0.56 | 0.44 | 0.52 | 0.43 | 0.52  | 0.41 | 0.551 | 0.46  | 0.52  | 0.43  | 0.54  | 0.45  | 0.59  |
| D6  | 0.44 | 0.55  | 0.44  | 0.54 | 0.46 | 0.52 | 0.45 | 0.52 | 0.41 | 0.52  | 0.42 | 0.53  | 0.46  | 0.521 | 0.42  | 0.524 | 0.44  | 0.520 |
| D7  | 0.44 | 0.569 | 0.43  | 0.59 | 0.46 | 0.56 | 0.46 | 0.54 | 0.51 | 0.559 | 0.50 | 0.55  | 0.42  | 0.56  | 0.50  | 0.54  | 0.52  | 0.55  |
| D8  | 0.50 | 0.54  | 0.51  | 0.59 | 0.52 | 0.54 | 0.52 | 0.54 | 0.52 | 0.54  | 0.56 | 0.61  | 0.50  | 0.55  | 0.521 | 0.541 | 0.551 | 0.59  |
| D9  | 0.44 | 0.52  | 0.45  | 0.59 | 0.45 | 0.52 | 0.44 | 0.54 | 0.43 | 0.55  | 0.45 | 0.55  | 0.51  | 0.56  | 0.45  | 0.59  | 0.45  | 0.60  |
| D10 | 0.44 | 0.52  | 0.42  | 0.53 | 0.44 | 0.52 | 0.45 | 0.56 | 0.45 | 0.53  | 0.44 | 0.52  | 0.46  | 0.51  | 0.45  | 0.50  | 0.45  | 0.51  |
| D11 | 0.46 | 0.53  | 0.44  | 0.52 | 0.45 | 0.52 | 0.45 | 0.52 | 0.45 | 0.52  | 0.49 | 0.54  | 0.44  | 0.52  | 0.51  | 0.56  | 0.53  | 0.59  |
| D12 | 0.45 | 0.51  | 0.44  | 0.53 | 0.49 | 0.52 | 0.50 | 0.54 | 0.52 | 0.56  | 0.49 | 0.53  | 0.51  | 0.59  | 0.522 | 0.56  | 0.56  | 0.60  |
| D13 | 0.53 | 0.61  | 0.52  | 0.59 | 0.46 | 0.50 | 0.46 | 0.52 | 0.50 | 0.56  | 0.52 | 0.64  | 0.53  | 0.62  | 0.50  | 0.61  | 0.51  | 0.62  |
| D14 | 0.49 | 0.52  | 0.46  | 0.55 | 0.54 | 0.59 | 0.54 | 0.59 | 0.50 | 0.55  | 0.55 | 0.62  | 0.54  | 0.62  | 0.54  | 0.61  | 0.49  | 0.55  |
| D15 | 0.51 | 0.56  | 0.46  | 0.59 | 0.52 | 0.56 | 0.45 | 0.52 | 0.52 | 0.56  | 0.51 | 0.61  | 0.56  | 0.59  | 0.45  | 0.56  | 0.55  | 0.64  |
| D16 | 0.44 | 0.50  | 0.53  | 0.59 | 0.51 | 0.56 | 0.49 | 0.55 | 0.56 | 0.60  | 0.51 | 0.59  | 0.46  | 0.51  | 0.51  | 0.55  | 0.50  | 0.59  |
| D17 | 0.49 | 0.53  | 0.46  | 0.51 | 0.51 | 0.57 | 0.52 | 0.58 | 0.49 | 0.54  | 0.59 | 0.62  | 0.56  | 0.58  | 0.56  | 0.59  | 0.57  | 0.60  |
| D18 | 0.46 | 0.51  | 0.46  | 0.54 | 0.44 | 0.51 | 0.35 | 0.59 | 0.54 | 0.59  | 0.59 | 0.62  | 0.57  | 0.61  | 0.52  | 0.61  | 0.56  | 0.63  |
| D19 | 0.49 | 0.52  | 0.52  | 0.61 | 0.57 | 0.60 | 0.52 | 0.62 | 0.45 | 0.52  | 0.52 | 0.6   | 0.49  | 0.54  | 0.45  | 0.51  | 0.54  | 0.61  |
| D20 | 0.45 | 0.54  | 0.44  | 0.56 | 0.57 | 0.59 | 0.58 | 0.62 | 0.50 | 0.56  | 0.51 | 0.62  | 0.514 | 0.61  | 0.45  | 0.52  | 0.52  | 0.59  |
| D21 | 0.51 | 0.58  | 0.41  | 0.52 | 0.45 | 0.51 | 0.45 | 0.52 | 0.50 | 0.59  | 0.51 | 0.61  | 0.46  | 0.59  | 0.41  | 0.50  | 0.41  | 0.55  |
| D22 | 0.50 | 0.56  | 0.51  | 0.59 | 0.49 | 0.56 | 0.54 | 0.59 | 0.41 | 0.51  | 0.50 | 0.59  | 0.46  | 0.52  | 0.50  | 0.56  | 0.51  | 0.61  |
| D23 | 0.54 | 0.59  | 0.56  | 0.61 | 0.51 | 0.58 | 0.51 | 0.59 | 0.52 | 0.56  | 0.49 | 0.56  | 0.54  | 0.59  | 0.52  | 0.56  | 0.56  | 0.60  |
| D24 | 0.49 | 0.53  | 0.46  | 0.54 | 0.51 | 0.56 | 0.45 | 0.55 | 0.45 | 0.51  | 0.50 | 0.61  | 0.41  | 0.50  | 0.52  | 0.59  | 0.51  | 0.59  |
| D25 | 0.51 | 0.54  | 0.46  | 0.51 | 0.52 | 0.56 | 0.50 | 0.57 | 0.52 | 0.59  | 0.51 | 0.61  | 0.51  | 0.56  | 0.52  | 0.59  | 0.46  | 0.55  |
| D26 | 0.40 | 0.52  | 0.41  | 0.55 | 0.40 | 0.59 | 0.53 | 0.58 | 0.52 | 0.56  | 0.59 | 0.63  | 0.56  | 0.60  | 0.52  | 0.56  | 0.56  | 0.62  |
| D27 | 0.48 | 0.55  | 0.56  | 0.60 | 0.50 | 0.55 | 0.51 | 0.59 | 0.45 | 0.56  | 0.51 | 0.59  | 0.40  | 0.55  | 0.41  | 0.56  | 0.55  | 0.63  |
| D28 | 0.44 | 0.59  | 0.51  | 0.61 | 0.51 | 0.59 | 0.45 | 0.59 | 0.50 | 0.59  | 0.51 | 0.60  | 0.51  | 0.61  | 0.52  | 0.58  | 0.52  | 0.59  |
| D29 | 0.52 | 0.58  | 0.54  | 0.62 | 0.41 | 0.54 | 0.44 | 0.51 | 0.44 | 0.54  | 0.41 | 0.56  | 0.46  | 0.55  | 0.52  | 0.59  | 0.51  | 0.60  |
| D30 | 0.41 | 0.52  | 0.46  | 0.59 | 0.51 | 0.56 | 0.45 | 0.54 | 0.51 | 0.55  | 0.52 | 0.61  | 0.49  | 0.55  | 0.51  | 0.55  | 0.51  | 0.60  |

Table S3: Accuracy measured by using ULR analysis.

| ID  | GD   |      | GDM  |             | GDA  |      | NM   |       | LM   |             | DNN  |             | BTE  |      | MVE  |      | NDTF |             |
|-----|------|------|------|-------------|------|------|------|-------|------|-------------|------|-------------|------|------|------|------|------|-------------|
|     | EF   | SF   | EF   | SF          | EF   | SF   | EF   | SF    | EF   | SF          | EF   | SF          | EF   | SF   | EF   | SF   | EF   | SF          |
| D1  | 51.4 | 54.9 | 48   | 54.6        | 47.6 | 55.4 | 53   | 57    | 55.4 | 62.1        | 53   | 58.5        | 51.5 | 55.9 | 50.2 | 59.9 | 58.5 | 60.6        |
| D2  | 52   | 59.4 | 49.3 | 54.0        | 48   | 53.9 | 46   | 52.61 | 53   | 59.9        | 59.8 | <b>63.9</b> | 52   | 56.7 | 54.6 | 61.3 | 53.6 | 59.8        |
| D3  | 54.2 | 59.5 | 48.2 | 51.2        | 51.2 | 56.3 | 53   | 55.5  | 52.2 | 56.5        | 59.3 | <b>65.2</b> | 46.8 | 50.6 | 52.2 | 56.7 | 56.4 | 60.3        |
| D4  | 53.5 | 55.9 | 46.8 | 49.9        | 52.2 | 55.7 | 51.2 | 56.6  | 50.3 | 53.4        | 56.2 | 59.9        | 46.6 | 50.2 | 51.3 | 53.6 | 54.6 | <b>60.5</b> |
| D5  | 50.2 | 53.4 | 42.5 | 47.2        | 52.3 | 56.5 | 45.5 | 52.6  | 51.3 | 57.5        | 54.3 | 59.9        | 46.6 | 52.2 | 53.4 | 54.6 | 55.5 | <b>61.3</b> |
| D6  | 50   | 53   | 51   | 59.9        | 46   | 52   | 45   | 54    | 50   | 54          | 52   | <b>61.1</b> | 46   | 49.9 | 51   | 54   | 53   | 55          |
| D7  | 44   | 49   | 53   | <b>59.9</b> | 51   | 56   | 40   | 45    | 51   | 59          | 50   | 55          | 42   | 46   | 50   | 53   | 52   | 55          |
| D8  | 44   | 53   | 46   | 49.9        | 52   | 59   | 54   | 59    | 53   | 59          | 55   | <b>61.1</b> | 42   | 45   | 52   | 55   | 56   | 60.1        |
| D9  | 44   | 52   | 44   | 49.9        | 50   | 54   | 51   | 54    | 53   | 55          | 55   | 65          | 51   | 56   | 53   | 60   | 59   | <b>66</b>   |
| D10 | 44   | 52   | 42   | 49.9        | 54   | 59   | 51   | 59    | 42   | 56          | 54   | <b>64.4</b> | 46   | 55   | 51   | 59   | 55   | 64          |
| D11 | 46   | 59   | 46   | 49.9        | 51   | 52   | 40   | 55    | 52   | 62          | 49   | 54.1        | 41   | 52   | 54   | 62   | 56   | <b>66</b>   |
| D12 | 45   | 59   | 44   | 52.3        | 41   | 55   | 40   | 54    | 42   | 56          | 49   | 55.1        | 42   | 50   | 52   | 56   | 46   | <b>60.0</b> |
| D13 | 43   | 59   | 56   | 60.2        | 41   | 56   | 46   | 55    | 42   | 56          | 49   | <b>64.1</b> | 45   | 53   | 50   | 56   | 51   | 62          |
| D14 | 50.6 | 56.8 | 46.9 | 59.2        | 44.3 | 58.4 | 55.4 | 62.8  | 54.8 | 61.9        | 48.5 | <b>62.1</b> | 42.4 | 57.8 | 54.3 | 61.3 | 52.8 | 61.9        |
| D15 | 51.2 | 57.3 | 57.2 | 59.2        | 51.8 | 60.9 | 43.5 | 55.9  | 52.9 | 56.9        | 52.8 | 61.8        | 56.9 | 61.3 | 54.9 | 58.9 | 58.9 | <b>65.9</b> |
| D16 | 44.2 | 59.3 | 46.1 | 49.3        | 51.2 | 56.8 | 42.1 | 59.5  | 58.1 | <b>66.9</b> | 51.2 | 63.1        | 46.8 | 50.8 | 52.2 | 56.9 | 51.2 | 62.4        |
| D17 | 44.4 | 58.9 | 46.3 | 53.9        | 50.3 | 61.2 | 50.9 | 55.8  | 43   | 56.9        | 51.8 | <b>63.9</b> | 46.8 | 54.8 | 42.3 | 61.3 | 46.7 | 62.8        |
| D18 | 44.2 | 52.3 | 46.1 | 52.9        | 44.8 | 56.8 | 54   | 62    | 53   | 62          | 59.8 | 64.3        | 56.8 | 61.2 | 53   | 61.8 | 58   | <b>65.8</b> |
| D19 | 43   | 59.2 | 56.2 | 58.94       | 53.2 | 59.3 | 48   | 57.3  | 52   | 58.3        | 53   | 62.9        | 46.8 | 53.8 | 52   | 58.1 | 53   | <b>66.1</b> |
| D20 | 49   | 54.1 | 54.2 | 62.6        | 51.9 | 62.1 | 48   | 52.2  | 53   | 59.3        | 48   | <b>61.9</b> | 53   | 61.2 | 53   | 59.8 | 53   | 61.9        |
| D21 | 54.2 | 61.2 | 43   | 58.9        | 52   | 57.2 | 49   | 53.1  | 52   | 59.8        | 53   | <b>63.2</b> | 56.9 | 59.8 | 43.1 | 58.1 | 49   | 55.2        |
| D22 | 46   | 52.2 | 49   | 59.2        | 53   | 59.2 | 43   | 50.2  | 53   | 55.9        | 51   | 62          | 56   | 62   | 52   | 61   | 56   | <b>63.9</b> |
| D23 | 44   | 55   | 46   | 59          | 51   | 58   | 45   | 59    | 42   | 56          | 49   | 60          | 40   | 55   | 42   | 56   | 46   | <b>63</b>   |
| D24 | 54   | 58   | 46   | 59.9        | 51   | 56   | 50   | 59    | 45   | 56          | 59   | <b>62.3</b> | 46   | 55   | 52   | 62   | 56   | 62          |
| D25 | 45   | 59   | 46   | 55          | 55   | 61   | 49   | 52    | 50   | 59          | 52   | <b>62</b>   | 51   | 62.8 | 52   | 61   | 56   | 61.5        |
| D26 | 40   | 52   | 46   | 55          | 50   | 61   | 50   | 59    | 52   | 56          | 59   | <b>64</b>   | 56   | 60   | 52   | 61   | 58   | 62.5        |
| D27 | 44   | 59   | 46   | 51.2        | 50   | 55   | 50   | 55    | 50   | 55          | 52   | 61.5        | 50   | 59   | 53   | 61   | 57.8 | <b>62.6</b> |
| D28 | 54   | 59   | 51   | 59.8        | 51   | 60.1 | 50   | 61.5  | 52   | 60.2        | 59   | <b>63.7</b> | 56   | 59   | 53   | 61.5 | 59   | 63.5        |
| D29 | 44   | 52.6 | 41   | 52.2        | 41   | 56.4 | 50.4 | 55.5  | 52.5 | 59.6        | 51   | 66.1        | 46   | 50.5 | 55.9 | 60.9 | 51   | <b>66.4</b> |
| D30 | 53   | 59.8 | 52.2 | 59.2        | 51   | 58   | 50   | 55    | 52   | 56          | 59   | <b>64.1</b> | 53   | 58   | 52   | 56.3 | 56.9 | 62.2        |

Table S4: F-Measure measured by ULR analysis.

| ID  | GD   |      | GDM  |       | GDA  |      | NM   |      | LM   |      | DNN   |       | BTE   |       | MVE   |       | NDTF |      |
|-----|------|------|------|-------|------|------|------|------|------|------|-------|-------|-------|-------|-------|-------|------|------|
|     | EF   | SF   | EF   | SF    | EF   | SF   | EF   | SF   | EF   | SF   | EF    | SF    | EF    | SF    | EF    | SF    | EF   | SF   |
| D1  | 0.60 | 0.68 | 0.58 | 0.591 | 0.52 | 0.53 | 0.52 | 0.58 | 0.50 | 0.59 | 0.48  | 0.53  | 0.49  | 0.57  | 0.43  | 0.52  | 0.51 | 0.57 |
| D2  | 0.44 | 0.57 | 0.52 | 0.57  | 0.50 | 0.56 | 0.48 | 0.56 | 0.47 | 0.60 | 0.51  | 0.57  | 0.47  | 0.59  | 0.47  | 0.58  | 0.47 | 0.59 |
| D3  | 0.47 | 0.58 | 0.48 | 0.58  | 0.46 | 0.57 | 0.47 | 0.58 | 0.49 | 0.59 | 0.51  | 0.58  | 0.49  | 0.57  | 0.48  | 0.59  | 0.48 | 0.58 |
| D4  | 0.44 | 0.57 | 0.49 | 0.58  | 0.47 | 0.57 | 0.47 | 0.59 | 0.49 | 0.58 | 0.48  | 0.57  | 0.49  | 0.58  | 0.48  | 0.59  | 0.49 | 0.60 |
| D5  | 0.48 | 0.58 | 0.47 | 0.52  | 0.47 | 0.57 | 0.48 | 0.53 | 0.43 | 0.41 | 0.551 | 0.551 | 0.46  | 0.52  | 0.43  | 0.54  | 0.45 | 0.59 |
| D6  | 0.48 | 0.54 | 0.48 | 0.57  | 0.48 | 0.53 | 0.46 | 0.53 | 0.41 | 0.52 | 0.42  | 0.53  | 0.46  | 0.521 | 0.42  | 0.524 | 0.44 | 0.52 |
| D7  | 0.45 | 0.57 | 0.45 | 0.59  | 0.46 | 0.57 | 0.46 | 0.56 | 0.51 | 0.58 | 0.51  | 0.58  | 0.47  | 0.58  | 0.51  | 0.58  | 0.49 | 0.56 |
| D8  | 0.52 | 0.57 | 0.52 | 0.58  | 0.53 | 0.58 | 0.52 | 0.59 | 0.52 | 0.54 | 0.56  | 0.62  | 0.52  | 0.58  | 0.53  | 0.57  | 0.55 | 0.60 |
| D9  | 0.49 | 0.58 | 0.49 | 0.59  | 0.47 | 0.53 | 0.48 | 0.58 | 0.47 | 0.58 | 0.48  | 0.59  | 0.57  | 0.59  | 0.48  | 0.59  | 0.49 | 0.60 |
| D10 | 0.49 | 0.58 | 0.47 | 0.57  | 0.48 | 0.58 | 0.47 | 0.57 | 0.47 | 0.58 | 0.47  | 0.59  | 0.46  | 0.57  | 0.45  | 0.54  | 0.45 | 0.57 |
| D11 | 0.45 | 0.54 | 0.43 | 0.53  | 0.46 | 0.53 | 0.46 | 0.53 | 0.46 | 0.53 | 0.48  | 0.54  | 0.44  | 0.52  | 0.51  | 0.56  | 0.53 | 0.59 |
| D12 | 0.46 | 0.52 | 0.45 | 0.52  | 0.48 | 0.51 | 0.51 | 0.53 | 0.53 | 0.57 | 0.48  | 0.53  | 0.51  | 0.59  | 0.522 | 0.56  | 0.56 | 0.60 |
| D13 | 0.52 | 0.62 | 0.53 | 0.58  | 0.45 | 0.51 | 0.45 | 0.51 | 0.51 | 0.55 | 0.52  | 0.64  | 0.53  | 0.62  | 0.50  | 0.61  | 0.51 | 0.62 |
| D14 | 0.51 | 0.55 | 0.47 | 0.56  | 0.52 | 0.58 | 0.53 | 0.58 | 0.51 | 0.54 | 0.55  | 0.62  | 0.54  | 0.62  | 0.54  | 0.60  | 0.49 | 0.59 |
| D15 | 0.52 | 0.58 | 0.45 | 0.58  | 0.51 | 0.57 | 0.46 | 0.51 | 0.51 | 0.57 | 0.51  | 0.61  | 0.56  | 0.59  | 0.45  | 0.56  | 0.55 | 0.64 |
| D16 | 0.46 | 0.52 | 0.52 | 0.58  | 0.52 | 0.55 | 0.48 | 0.54 | 0.55 | 0.61 | 0.51  | 0.59  | 0.46  | 0.51  | 0.51  | 0.55  | 0.50 | 0.59 |
| D17 | 0.51 | 0.58 | 0.45 | 0.50  | 0.51 | 0.57 | 0.51 | 0.57 | 0.48 | 0.53 | 0.59  | 0.62  | 0.56  | 0.58  | 0.56  | 0.59  | 0.57 | 0.61 |
| D18 | 0.45 | 0.50 | 0.45 | 0.53  | 0.43 | 0.50 | 0.54 | 0.58 | 0.53 | 0.58 | 0.59  | 0.62  | 0.57  | 0.61  | 0.52  | 0.61  | 0.56 | 0.63 |
| D19 | 0.48 | 0.51 | 0.51 | 0.60  | 0.56 | 0.61 | 0.51 | 0.61 | 0.44 | 0.52 | 0.52  | 0.6   | 0.49  | 0.54  | 0.45  | 0.51  | 0.54 | 0.61 |
| D20 | 0.48 | 0.53 | 0.45 | 0.55  | 0.56 | 0.58 | 0.57 | 0.61 | 0.51 | 0.55 | 0.51  | 0.62  | 0.514 | 0.61  | 0.45  | 0.52  | 0.52 | 0.59 |
| D21 | 0.52 | 0.57 | 0.42 | 0.53  | 0.46 | 0.50 | 0.46 | 0.51 | 0.51 | 0.59 | 0.53  | 0.62  | 0.46  | 0.59  | 0.41  | 0.50  | 0.41 | 0.55 |
| D22 | 0.51 | 0.55 | 0.52 | 0.58  | 0.48 | 0.55 | 0.53 | 0.58 | 0.40 | 0.50 | 0.51  | 0.59  | 0.46  | 0.52  | 0.50  | 0.56  | 0.51 | 0.61 |
| D23 | 0.53 | 0.58 | 0.55 | 0.60  | 0.50 | 0.57 | 0.50 | 0.58 | 0.52 | 0.56 | 0.49  | 0.56  | 0.54  | 0.59  | 0.52  | 0.56  | 0.56 | 0.60 |
| D24 | 0.48 | 0.52 | 0.47 | 0.53  | 0.52 | 0.55 | 0.46 | 0.56 | 0.46 | 0.52 | 0.51  | 0.61  | 0.41  | 0.50  | 0.52  | 0.59  | 0.51 | 0.59 |
| D25 | 0.50 | 0.53 | 0.47 | 0.50  | 0.53 | 0.55 | 0.51 | 0.56 | 0.51 | 0.58 | 0.50  | 0.61  | 0.51  | 0.56  | 0.52  | 0.59  | 0.46 | 0.55 |
| D26 | 0.41 | 0.51 | 0.40 | 0.56  | 0.41 | 0.58 | 0.52 | 0.57 | 0.53 | 0.57 | 0.59  | 0.63  | 0.56  | 0.60  | 0.52  | 0.56  | 0.56 | 0.62 |
| D27 | 0.47 | 0.54 | 0.55 | 0.61  | 0.51 | 0.54 | 0.50 | 0.58 | 0.46 | 0.55 | 0.50  | 0.59  | 0.40  | 0.55  | 0.41  | 0.56  | 0.55 | 0.63 |
| D28 | 0.47 | 0.58 | 0.52 | 0.60  | 0.50 | 0.58 | 0.44 | 0.58 | 0.51 | 0.59 | 0.51  | 0.61  | 0.51  | 0.61  | 0.52  | 0.58  | 0.52 | 0.59 |
| D29 | 0.51 | 0.57 | 0.53 | 0.60  | 0.40 | 0.53 | 0.43 | 0.50 | 0.43 | 0.53 | 0.41  | 0.56  | 0.46  | 0.55  | 0.52  | 0.59  | 0.51 | 0.61 |
| D30 | 0.47 | 0.51 | 0.47 | 0.58  | 0.50 | 0.55 | 0.46 | 0.55 | 0.52 | 0.54 | 0.51  | 0.61  | 0.49  | 0.55  | 0.51  | 0.55  | 0.56 | 0.60 |

**Table S5:** Accuracy measured by using Cross correlation analysis.

| ID  | GD   |      | GDM  |             | GDA  |      | NM   |       | LM   |             | DNN  |             | BTE  |      | MVE  |      | NDTF |             |
|-----|------|------|------|-------------|------|------|------|-------|------|-------------|------|-------------|------|------|------|------|------|-------------|
|     | EF   | SF   | EF   | SF          | EF   | SF   | EF   | SF    | EF   | SF          | EF   | SF          | EF   | SF   | EF   | SF   | EF   | SF          |
| D1  | 53.4 | 57.9 | 48   | 54.6        | 47.6 | 55.4 | 53   | 57    | 57.4 | <b>63.1</b> | 53   | 58.5        | 51.5 | 55.9 | 50.2 | 59.9 | 58.5 | 60.6        |
| D2  | 53.2 | 59.4 | 49.3 | 54.0        | 48   | 53.9 | 46   | 52.61 | 53   | 59.9        | 59.8 | <b>62.3</b> | 52   | 56.7 | 54.6 | 61.3 | 53.6 | 59.8        |
| D3  | 54.2 | 59.5 | 48.2 | 51.2        | 51.2 | 56.3 | 53   | 55.5  | 52.2 | 56.5        | 59.3 | <b>64.2</b> | 46.8 | 50.6 | 52.2 | 56.7 | 56.4 | 60.3        |
| D4  | 53.5 | 55.9 | 46.8 | 49.9        | 52.2 | 55.7 | 51.2 | 56.6  | 50.3 | 53.4        | 56.2 | 59.9        | 46.6 | 50.2 | 51.3 | 53.6 | 54.6 | <b>62.5</b> |
| D5  | 50.2 | 53.4 | 42.5 | 47.2        | 52.3 | 56.5 | 45.5 | 52.6  | 51.3 | 57.5        | 54.3 | 59.9        | 46.6 | 52.2 | 53.4 | 54.6 | 55.5 | <b>62.3</b> |
| D6  | 53   | 59   | 51   | 59.9        | 46   | 52   | 45   | 54    | 50   | 54          | 52   | <b>62.1</b> | 46   | 49.9 | 51   | 54   | 53   | 55          |
| D7  | 49   | 59   | 53   | <b>60.9</b> | 51   | 56   | 40   | 45    | 51   | 59          | 50   | 55          | 42   | 46   | 50   | 53   | 52   | 55          |
| D8  | 49   | 53   | 46   | 49.9        | 52   | 59   | 54   | 59    | 53   | 59          | 55   | <b>61.9</b> | 42   | 45   | 52   | 55   | 56   | 60.1        |
| D9  | 54   | 59.8 | 44   | 49.9        | 50   | 54   | 51   | 54    | 53   | 55          | 55   | 65          | 51   | 56   | 53   | 60   | 59   | <b>66</b>   |
| D10 | 56   | 59   | 42   | 49.9        | 54   | 59   | 51   | 59    | 42   | 56          | 54   | <b>64.4</b> | 46   | 55   | 51   | 59   | 55   | 64          |
| D11 | 56   | 59.9 | 46   | 49.9        | 51   | 52   | 40   | 55    | 52   | 62          | 49   | 54.1        | 41   | 52   | 54   | 62   | 56   | <b>66</b>   |
| D12 | 55.2 | 59   | 44   | 52.3        | 41   | 55   | 40   | 54    | 42   | 56          | 49   | 55.1        | 42   | 50   | 52   | 56   | 46   | <b>60.0</b> |
| D13 | 53.8 | 59   | 56   | 60.2        | 41   | 56   | 46   | 55    | 42   | 56          | 49   | <b>64.1</b> | 45   | 53   | 50   | 56   | 51   | 62          |
| D14 | 50.6 | 56.8 | 46.9 | 59.2        | 44.3 | 58.4 | 55.4 | 62.8  | 54.8 | 61.9        | 48.5 | <b>62.1</b> | 42.4 | 57.8 | 54.3 | 61.3 | 52.8 | 61.9        |
| D15 | 51.2 | 57.3 | 57.2 | 59.2        | 51.8 | 60.9 | 43.5 | 55.9  | 52.9 | 56.9        | 52.8 | 61.8        | 56.9 | 61.3 | 54.9 | 58.9 | 58.9 | <b>65.9</b> |
| D16 | 44.2 | 59.3 | 46.1 | 49.3        | 51.2 | 56.8 | 42.1 | 59.5  | 58.1 | <b>66.9</b> | 51.2 | 63.1        | 46.8 | 50.8 | 52.2 | 56.9 | 51.2 | 62.4        |
| D17 | 44.4 | 58.9 | 46.3 | 53.9        | 50.3 | 61.2 | 50.9 | 55.8  | 43   | 56.9        | 51.8 | <b>63.9</b> | 46.8 | 54.8 | 42.3 | 61.3 | 46.7 | 62.8        |
| D18 | 44.2 | 52.3 | 46.1 | 52.9        | 44.8 | 56.8 | 54   | 62    | 53   | 62          | 59.8 | 64.3        | 56.8 | 61.2 | 53   | 61.8 | 58   | <b>65.8</b> |
| D19 | 43   | 59.2 | 56.2 | 58.94       | 53.2 | 59.3 | 48   | 57.3  | 52   | 58.3        | 53   | 62.9        | 46.8 | 53.8 | 52   | 58.1 | 53   | <b>66.1</b> |
| D20 | 49   | 54.1 | 54.2 | 62.6        | 51.9 | 62.1 | 48   | 52.2  | 53   | 59.3        | 48   | <b>61.9</b> | 53   | 61.2 | 53   | 59.8 | 53   | 61.9        |
| D21 | 54.2 | 61.2 | 43   | 58.9        | 52   | 57.2 | 49   | 53.1  | 52   | 59.8        | 53   | <b>63.2</b> | 56.9 | 59.8 | 43.1 | 58.1 | 49   | 55.2        |
| D22 | 46   | 52.2 | 49   | 59.2        | 53   | 59.2 | 43   | 50.2  | 53   | 55.9        | 51   | 62          | 56   | 62   | 52   | 61   | 56   | <b>63.9</b> |
| D23 | 44   | 55   | 46   | 59          | 51   | 58   | 45   | 59    | 42   | 56          | 49   | 60          | 40   | 55   | 42   | 56   | 46   | <b>63</b>   |
| D24 | 54   | 58   | 46   | 59.9        | 51   | 56   | 50   | 59    | 45   | 56          | 59   | <b>62.3</b> | 46   | 55   | 52   | 62   | 56   | 62          |
| D25 | 45   | 59   | 46   | 55          | 55   | 61   | 49   | 52    | 50   | 59          | 52   | <b>62</b>   | 51   | 62.8 | 52   | 61   | 56   | 61.5        |
| D26 | 40   | 52   | 46   | 55          | 50   | 61   | 50   | 59    | 52   | 56          | 59   | <b>64</b>   | 56   | 60   | 52   | 61   | 58   | 62.5        |
| D27 | 44   | 59   | 46   | 51.2        | 50   | 55   | 50   | 55    | 50   | 55          | 52   | 61.5        | 50   | 59   | 53   | 61   | 57.8 | <b>62.6</b> |
| D28 | 54   | 59   | 51   | 59.8        | 51   | 60.1 | 50   | 61.5  | 52   | 60.2        | 59   | <b>63.7</b> | 56   | 59   | 53   | 61.5 | 59   | 63.5        |
| D29 | 44   | 52.6 | 41   | 52.2        | 41   | 56.4 | 50.4 | 55.5  | 52.5 | 59.6        | 51   | 66.1        | 46   | 50.5 | 55.9 | 60.9 | 51   | <b>66.4</b> |
| D30 | 53   | 59.8 | 52.2 | 59.2        | 51   | 58   | 50   | 55    | 52   | 56          | 59   | <b>64.1</b> | 53   | 58   | 52   | 56.3 | 56.9 | 62.2        |

Table S6: F-Measure measured by using Cross correlation analysis.

| ID  | GD   |      | GDM  |             | GDA  |      | NM   |      | LM          |             | DNN         |      | BTE  |      | MVE  |      | NDTF        |    |
|-----|------|------|------|-------------|------|------|------|------|-------------|-------------|-------------|------|------|------|------|------|-------------|----|
|     | EF   | SF   | EF   | SF          | EF   | SF   | EF   | SF   | EF          | SF          | EF          | SF   | EF   | SF   | EF   | SF   | EF          | SF |
| D1  | 0.52 | 0.57 | 0.51 | 0.58        | 0.50 | 0.52 | 0.58 | 0.50 | <b>0.62</b> | 0.50        | 0.55        | 0.51 | 0.57 | 0.50 | 0.58 | 0.51 | 0.57        |    |
| D2  | 0.52 | 0.57 | 0.51 | 0.58        | 0.50 | 0.56 | 0.51 | 0.58 | <b>0.61</b> | 0.51        | 0.57        | 0.51 | 0.59 | 0.50 | 0.58 | 0.51 | 0.59        |    |
| D3  | 0.52 | 0.58 | 0.53 | 0.58        | 0.51 | 0.57 | 0.52 | 0.51 | 0.58        | 0.50        | <b>0.60</b> | 0.52 | 0.59 | 0.51 | 0.59 | 0.51 | 0.58        |    |
| D4  | 0.52 | 0.57 | 0.52 | 0.58        | 0.51 | 0.57 | 0.50 | 0.58 | 0.51        | 0.57        | 0.56        | 0.50 | 0.58 | 0.50 | 0.59 | 0.51 | <b>0.60</b> |    |
| D5  | 0.51 | 0.58 | 0.51 | 0.58        | 0.50 | 0.57 | 0.51 | 0.58 | 0.51        | 0.56        | 0.59        | 0.51 | 0.59 | 0.53 | 0.55 | 0.55 | <b>0.61</b> |    |
| D6  | 0.51 | 0.54 | 0.50 | 0.55        | 0.55 | 0.58 | 0.50 | 0.57 | 0.58        | 0.57        | <b>0.63</b> | 0.56 | 0.59 | 0.52 | 0.58 | 0.55 | 0.60        |    |
| D7  | 0.51 | 0.57 | 0.55 | <b>0.58</b> | 0.52 | 0.57 | 0.50 | 0.55 | 0.57        | 0.51        | 0.58        | 0.50 | 0.58 | 0.51 | 0.58 | 0.50 | 0.59        |    |
| D8  | 0.52 | 0.57 | 0.53 | 0.58        | 0.54 | 0.58 | 0.52 | 0.58 | 0.51        | 0.56        | <b>0.61</b> | 0.52 | 0.58 | 0.53 | 0.57 | 0.55 | 0.60        |    |
| D9  | 0.50 | 0.57 | 0.51 | 0.58        | 0.50 | 0.57 | 0.50 | 0.58 | 0.51        | 0.58        | <b>0.60</b> | 0.54 | 0.59 | 0.52 | 0.59 | 0.59 | <b>0.60</b> |    |
| D10 | 0.52 | 0.58 | 0.50 | 0.57        | 0.52 | 0.58 | 0.50 | 0.57 | 0.51        | 0.58        | 0.52        | 0.52 | 0.57 | 0.51 | 0.58 | 0.51 | 0.59        |    |
| D11 | 0.50 | 0.55 | 0.50 | 0.56        | 0.50 | 0.57 | 0.51 | 0.53 | 0.50        | 0.57        | 0.57        | 0.51 | 0.59 | 0.51 | 0.56 | 0.53 | <b>0.61</b> |    |
| D12 | 0.50 | 0.56 | 0.50 | 0.57        | 0.50 | 0.57 | 0.51 | 0.54 | 0.51        | 0.58        | 0.57        | 0.50 | 0.59 | 0.52 | 0.56 | 0.56 | <b>0.60</b> |    |
| D13 | 0.52 | 0.60 | 0.51 | 0.58        | 0.50 | 0.58 | 0.50 | 0.57 | 0.55        | 0.52        | <b>0.65</b> | 0.53 | 0.62 | 0.50 | 0.61 | 0.51 | 0.62        |    |
| D14 | 0.51 | 0.55 | 0.50 | 0.56        | 0.52 | 0.58 | 0.54 | 0.58 | 0.51        | 0.54        | <b>0.62</b> | 0.55 | 0.61 | 0.55 | 0.60 | 0.59 | 0.59        |    |
| D15 | 0.52 | 0.58 | 0.55 | 0.58        | 0.51 | 0.55 | 0.54 | 0.58 | 0.51        | 0.55        | 0.60        | 0.55 | 0.59 | 0.55 | 0.56 | 0.55 | <b>0.65</b> |    |
| D16 | 0.50 | 0.57 | 0.52 | 0.58        | 0.50 | 0.55 | 0.50 | 0.54 | 0.55        | <b>0.62</b> | 0.51        | 0.59 | 0.51 | 0.55 | 0.50 | 0.59 | 0.59        |    |
| D17 | 0.51 | 0.58 | 0.55 | 0.50        | 0.51 | 0.57 | 0.51 | 0.57 | 0.51        | 0.54        | 0.50        | 0.52 | 0.58 | 0.51 | 0.59 | 0.57 | 0.61        |    |
| D18 | 0.51 | 0.58 | 0.53 | 0.57        | 0.50 | 0.58 | 0.50 | 0.58 | 0.56        | 0.58        | 0.62        | 0.57 | 0.61 | 0.52 | 0.61 | 0.56 | <b>0.63</b> |    |
| D19 | 0.50 | 0.58 | 0.51 | 0.60        | 0.56 | 0.61 | 0.51 | 0.61 | 0.54        | 0.51        | 0.6         | 0.51 | 0.58 | 0.55 | 0.59 | 0.55 | <b>0.61</b> |    |
| D20 | 0.50 | 0.56 | 0.51 | 0.58        | 0.50 | 0.58 | 0.52 | 0.61 | 0.51        | 0.55        | <b>0.62</b> | 0.51 | 0.61 | 0.55 | 0.61 | 0.52 | 0.59        |    |
| D21 | 0.51 | 0.56 | 0.51 | 0.52        | 0.51 | 0.55 | 0.51 | 0.56 | 0.52        | 0.57        | <b>0.62</b> | 0.56 | 0.59 | 0.51 | 0.58 | 0.51 | 0.55        |    |
| D22 | 0.52 | 0.56 | 0.51 | 0.57        | 0.51 | 0.55 | 0.53 | 0.57 | 0.51        | 0.50        | 0.59        | 0.51 | 0.58 | 0.50 | 0.56 | 0.51 | <b>0.61</b> |    |
| D23 | 0.54 | 0.58 | 0.57 | 0.60        | 0.52 | 0.59 | 0.52 | 0.58 | 0.53        | 0.55        | 0.56        | 0.55 | 0.59 | 0.52 | 0.56 | 0.56 | <b>0.60</b> |    |
| D24 | 0.50 | 0.56 | 0.52 | 0.57        | 0.52 | 0.55 | 0.50 | 0.58 | 0.56        | 0.58        | 0.51        | 0.51 | 0.59 | 0.52 | 0.59 | 0.51 | 0.59        |    |
| D25 | 0.50 | 0.56 | 0.50 | 0.59        | 0.53 | 0.55 | 0.51 | 0.58 | 0.53        | 0.58        | <b>0.61</b> | 0.51 | 0.56 | 0.52 | 0.59 | 0.56 | 0.60        |    |
| D26 | 0.51 | 0.53 | 0.52 | 0.54        | 0.51 | 0.58 | 0.54 | 0.57 | 0.53        | 0.57        | <b>0.63</b> | 0.56 | 0.60 | 0.52 | 0.56 | 0.56 | 0.62        |    |
| D27 | 0.57 | 0.56 | 0.57 | 0.61        | 0.51 | 0.54 | 0.52 | 0.58 | 0.54        | 0.55        | 0.58        | 0.50 | 0.55 | 0.51 | 0.56 | 0.55 | <b>0.63</b> |    |
| D28 | 0.52 | 0.58 | 0.52 | 0.60        | 0.52 | 0.58 | 0.56 | 0.58 | 0.51        | 0.58        | 0.61        | 0.51 | 0.61 | 0.52 | 0.58 | 0.52 | 0.59        |    |
| D29 | 0.53 | 0.57 | 0.56 | 0.61        | 0.50 | 0.54 | 0.54 | 0.50 | 0.54        | 0.50        | 0.56        | 0.56 | 0.55 | 0.52 | 0.59 | 0.51 | <b>0.61</b> |    |
| D30 | 0.57 | 0.51 | 0.55 | 0.58        | 0.50 | 0.55 | 0.54 | 0.54 | 0.50        | 0.54        | <b>0.63</b> | 0.59 | 0.55 | 0.51 | 0.55 | 0.56 | 0.60        |    |

**Table S7:** Accuracy measured by using Multivariate linear regression stepwise forward selection.

| ID  | GD   |      | GDM  |             | GDA  |      | NM   |       | LM   |             | DNN  |             | BTE  |      | MVE  |      | NDTF |             |
|-----|------|------|------|-------------|------|------|------|-------|------|-------------|------|-------------|------|------|------|------|------|-------------|
|     | EF   | SF   | EF   | SF          | EF   | SF   | EF   | SF    | EF   | SF          | EF   | SF          | EF   | SF   | EF   | SF   | EF   | SF          |
| D1  | 53.4 | 57.9 | 48   | 54.6        | 47.6 | 55.4 | 53   | 57    | 57.4 | <b>63.1</b> | 53   | 58.5        | 51.5 | 55.9 | 50.2 | 59.9 | 58.5 | 60.6        |
| D2  | 53.2 | 59.4 | 49.3 | 54.0        | 48   | 53.9 | 46   | 52.61 | 53   | 59.9        | 59.8 | <b>62.3</b> | 52   | 56.7 | 54.6 | 61.3 | 53.6 | 59.8        |
| D3  | 54.2 | 59.5 | 48.2 | 51.2        | 51.2 | 56.3 | 53   | 55.5  | 52.2 | 56.5        | 59.3 | <b>64.2</b> | 46.8 | 50.6 | 52.2 | 56.7 | 56.4 | 60.3        |
| D4  | 53.5 | 55.9 | 46.8 | 49.9        | 52.2 | 55.7 | 51.2 | 56.6  | 50.3 | 53.4        | 56.2 | 59.9        | 46.6 | 50.2 | 51.3 | 53.6 | 54.6 | <b>62.5</b> |
| D5  | 50.2 | 53.4 | 42.5 | 47.2        | 52.3 | 56.5 | 45.5 | 52.6  | 51.3 | 57.5        | 54.3 | 59.9        | 46.6 | 52.2 | 53.4 | 54.6 | 55.5 | <b>62.3</b> |
| D6  | 53   | 59   | 51   | 59.9        | 46   | 52   | 45   | 54    | 50   | 54          | 52   | <b>62.1</b> | 46   | 49.9 | 51   | 54   | 53   | 55          |
| D7  | 49   | 59   | 53   | <b>60.9</b> | 51   | 56   | 40   | 45    | 51   | 59          | 50   | 55          | 42   | 46   | 50   | 53   | 52   | 55          |
| D8  | 49   | 53   | 46   | 49.9        | 52   | 59   | 54   | 59    | 53   | 59          | 55   | <b>61.9</b> | 42   | 45   | 52   | 55   | 56   | 60.1        |
| D9  | 54   | 59.8 | 44   | 49.9        | 50   | 54   | 51   | 54    | 53   | 55          | 55   | 65          | 51   | 56   | 53   | 60   | 59   | <b>66</b>   |
| D10 | 56   | 59   | 42   | 49.9        | 54   | 59   | 51   | 59    | 42   | 56          | 54   | <b>64.4</b> | 46   | 55   | 51   | 59   | 55   | 64          |
| D11 | 56   | 59.9 | 46   | 49.9        | 51   | 52   | 40   | 55    | 52   | 62          | 49   | 54.1        | 41   | 52   | 54   | 62   | 56   | <b>66</b>   |
| D12 | 55.2 | 59   | 44   | 52.3        | 41   | 55   | 40   | 54    | 42   | 56          | 49   | 55.1        | 42   | 50   | 52   | 56   | 46   | <b>60.0</b> |
| D13 | 53.8 | 59   | 56   | 60.2        | 41   | 56   | 46   | 55    | 42   | 56          | 49   | <b>64.1</b> | 45   | 53   | 50   | 56   | 51   | 62          |
| D14 | 50.6 | 56.8 | 46.9 | 59.2        | 44.3 | 58.4 | 55.4 | 62.8  | 54.8 | 61.9        | 48.5 | <b>62.1</b> | 42.4 | 57.8 | 54.3 | 61.3 | 52.8 | 61.9        |
| D15 | 51.2 | 57.3 | 57.2 | 59.2        | 51.8 | 60.9 | 43.5 | 55.9  | 52.9 | 56.9        | 52.8 | 61.8        | 56.9 | 61.3 | 54.9 | 58.9 | 58.9 | <b>65.9</b> |
| D16 | 54.2 | 59.3 | 46.1 | 49.3        | 51.2 | 56.8 | 42.1 | 59.5  | 58.1 | <b>67.9</b> | 51.2 | 63.1        | 46.8 | 50.8 | 52.2 | 56.9 | 51.2 | 62.4        |
| D17 | 54.4 | 58.9 | 46.3 | 53.9        | 50.3 | 61.2 | 50.9 | 55.8  | 43   | 56.9        | 51.8 | <b>64.9</b> | 46.8 | 54.8 | 42.3 | 61.3 | 46.7 | 62.8        |
| D18 | 54.2 | 58.3 | 46.1 | 52.9        | 44.8 | 56.8 | 54   | 62    | 53   | 62          | 59.8 | 64.3        | 56.8 | 61.2 | 53   | 61.8 | 58   | <b>65.8</b> |
| D19 | 43   | 59.2 | 56.2 | 58.94       | 53.2 | 59.3 | 48   | 57.3  | 52   | 58.3        | 53   | 62.9        | 46.8 | 53.8 | 52   | 58.1 | 53   | <b>66.1</b> |
| D20 | 50.3 | 54.1 | 54.2 | 62.6        | 51.9 | 62.1 | 48   | 52.2  | 53   | 59.3        | 48   | <b>61.9</b> | 53   | 61.2 | 53   | 59.8 | 53   | 61.9        |
| D21 | 54.2 | 61.2 | 43   | 58.9        | 52   | 57.2 | 49   | 53.1  | 52   | 59.8        | 53   | <b>63.2</b> | 56.9 | 59.8 | 43.1 | 58.1 | 49   | 55.2        |
| D22 | 51.2 | 57.2 | 49   | 59.2        | 53   | 59.2 | 43   | 50.2  | 53   | 55.9        | 51   | 62          | 56   | 62   | 52   | 61   | 56   | <b>63.9</b> |
| D23 | 54   | 59.8 | 46   | 59          | 51   | 58   | 45   | 59    | 42   | 56          | 49   | 60          | 40   | 55   | 42   | 56   | 46   | <b>63</b>   |
| D24 | 54   | 58   | 46   | 59.9        | 51   | 56   | 50   | 59    | 45   | 56          | 59   | <b>62.3</b> | 46   | 55   | 52   | 62   | 56   | 62          |
| D25 | 45   | 59   | 46   | 55          | 55   | 61   | 49   | 52    | 50   | 59          | 52   | <b>62</b>   | 51   | 62.8 | 52   | 61   | 56   | 61.5        |
| D26 | 49.9 | 53.9 | 46   | 55          | 50   | 61   | 50   | 59    | 52   | 56          | 59   | <b>64</b>   | 56   | 60   | 52   | 61   | 58   | 62.5        |
| D27 | 52.3 | 59   | 46   | 51.2        | 50   | 55   | 50   | 55    | 50   | 55          | 52   | 61.5        | 50   | 59   | 53   | 61   | 57.8 | <b>62.6</b> |
| D28 | 54   | 59   | 51   | 59.8        | 51   | 60.1 | 50   | 61.5  | 52   | 60.2        | 59   | <b>63.7</b> | 56   | 59   | 53   | 61.5 | 59   | 63.5        |
| D29 | 51.8 | 59.6 | 41   | 52.2        | 41   | 56.4 | 50.4 | 55.5  | 52.5 | 59.6        | 51   | 66.1        | 46   | 50.5 | 55.9 | 60.9 | 51   | <b>66.4</b> |
| D30 | 53   | 59.8 | 52.2 | 59.2        | 51   | 58   | 50   | 55    | 52   | 56          | 59   | <b>64.1</b> | 53   | 58   | 52   | 56.3 | 56.9 | 62.2        |

**Table S8:** F-Measure measured by using Multivariate linear regression stepwise forward selection.

| ID  | GD   |      | GDM  |      | GDA  |      | NM   |      | LM   |      | DNN  |       | BTE  |      | MVE  |      | NDTF |    |
|-----|------|------|------|------|------|------|------|------|------|------|------|-------|------|------|------|------|------|----|
|     | EF   | SF   | EF   | SF   | EF   | SF   | EF   | SF   | EF   | SF   | EF   | SF    | EF   | SF   | EF   | SF   | EF   | SF |
| D1  | 0.52 | 0.57 | 0.51 | 0.58 | 0.52 | 0.58 | 0.52 | 0.58 | 0.62 | 0.50 | 0.55 | 0.51  | 0.57 | 0.50 | 0.58 | 0.51 | 0.57 |    |
| D2  | 0.52 | 0.57 | 0.51 | 0.57 | 0.52 | 0.56 | 0.51 | 0.58 | 0.62 | 0.51 | 0.57 | 0.51  | 0.59 | 0.50 | 0.58 | 0.51 | 0.59 |    |
| D3  | 0.50 | 0.58 | 0.53 | 0.58 | 0.51 | 0.57 | 0.52 | 0.57 | 0.58 | 0.50 | 0.60 | 0.52  | 0.59 | 0.51 | 0.59 | 0.51 | 0.58 |    |
| D4  | 0.52 | 0.57 | 0.52 | 0.58 | 0.53 | 0.57 | 0.52 | 0.58 | 0.51 | 0.57 | 0.57 | 0.50  | 0.58 | 0.50 | 0.59 | 0.51 | 0.60 |    |
| D5  | 0.51 | 0.58 | 0.51 | 0.56 | 0.52 | 0.57 | 0.53 | 0.58 | 0.56 | 0.52 | 0.59 | 0.51  | 0.59 | 0.53 | 0.55 | 0.55 | 0.61 |    |
| D6  | 0.51 | 0.56 | 0.50 | 0.55 | 0.55 | 0.58 | 0.52 | 0.59 | 0.58 | 0.57 | 0.63 | 0.56  | 0.59 | 0.52 | 0.58 | 0.55 | 0.60 |    |
| D7  | 0.50 | 0.59 | 0.57 | 0.59 | 0.50 | 0.57 | 0.52 | 0.55 | 0.57 | 0.51 | 0.58 | 0.50  | 0.58 | 0.51 | 0.58 | 0.50 | 0.59 |    |
| D8  | 0.52 | 0.57 | 0.52 | 0.58 | 0.56 | 0.58 | 0.52 | 0.58 | 0.51 | 0.56 | 0.62 | 0.52  | 0.58 | 0.53 | 0.57 | 0.55 | 0.60 |    |
| D9  | 0.50 | 0.57 | 0.51 | 0.58 | 0.52 | 0.57 | 0.50 | 0.58 | 0.51 | 0.58 | 0.59 | 0.54  | 0.59 | 0.52 | 0.59 | 0.59 | 0.60 |    |
| D10 | 0.52 | 0.58 | 0.52 | 0.57 | 0.52 | 0.58 | 0.52 | 0.57 | 0.53 | 0.52 | 0.60 | 0.52  | 0.57 | 0.51 | 0.58 | 0.51 | 0.59 |    |
| D11 | 0.50 | 0.55 | 0.52 | 0.58 | 0.50 | 0.51 | 0.51 | 0.53 | 0.57 | 0.51 | 0.57 | 0.50  | 0.59 | 0.51 | 0.56 | 0.53 | 0.61 |    |
| D12 | 0.52 | 0.56 | 0.52 | 0.57 | 0.52 | 0.57 | 0.52 | 0.54 | 0.53 | 0.50 | 0.57 | 0.50  | 0.59 | 0.52 | 0.56 | 0.56 | 0.60 |    |
| D13 | 0.52 | 0.60 | 0.53 | 0.58 | 0.52 | 0.58 | 0.52 | 0.57 | 0.51 | 0.53 | 0.65 | 0.53  | 0.62 | 0.50 | 0.61 | 0.51 | 0.62 |    |
| D14 | 0.53 | 0.55 | 0.52 | 0.56 | 0.52 | 0.58 | 0.56 | 0.58 | 0.51 | 0.54 | 0.62 | 0.55  | 0.61 | 0.55 | 0.60 | 0.59 | 0.59 |    |
| D15 | 0.52 | 0.58 | 0.57 | 0.58 | 0.53 | 0.57 | 0.56 | 0.58 | 0.53 | 0.57 | 0.61 | 0.56  | 0.59 | 0.55 | 0.56 | 0.55 | 0.65 |    |
| D16 | 0.48 | 0.52 | 0.52 | 0.58 | 0.52 | 0.55 | 0.48 | 0.54 | 0.55 | 0.61 | 0.59 | 0.46  | 0.51 | 0.51 | 0.55 | 0.50 | 0.59 |    |
| D17 | 0.51 | 0.58 | 0.47 | 0.52 | 0.53 | 0.57 | 0.51 | 0.57 | 0.47 | 0.53 | 0.62 | 0.56  | 0.58 | 0.56 | 0.59 | 0.57 | 0.61 |    |
| D18 | 0.47 | 0.5  | 0.47 | 0.53 | 0.45 | 0.52 | 0.54 | 0.58 | 0.53 | 0.58 | 0.62 | 0.57  | 0.61 | 0.52 | 0.61 | 0.56 | 0.63 |    |
| D19 | 0.48 | 0.51 | 0.51 | 0.60 | 0.56 | 0.61 | 0.51 | 0.6  | 0.47 | 0.53 | 0.6  | 0.49  | 0.54 | 0.45 | 0.51 | 0.54 | 0.61 |    |
| D20 | 0.48 | 0.53 | 0.45 | 0.55 | 0.58 | 0.58 | 0.57 | 0.61 | 0.51 | 0.55 | 0.62 | 0.514 | 0.61 | 0.45 | 0.52 | 0.52 | 0.59 |    |
| D21 | 0.52 | 0.57 | 0.42 | 0.51 | 0.46 | 0.52 | 0.46 | 0.51 | 0.51 | 0.58 | 0.62 | 0.46  | 0.59 | 0.41 | 0.50 | 0.41 | 0.55 |    |
| D22 | 0.50 | 0.56 | 0.51 | 0.59 | 0.49 | 0.56 | 0.54 | 0.59 | 0.41 | 0.51 | 0.58 | 0.46  | 0.52 | 0.50 | 0.56 | 0.51 | 0.61 |    |
| D23 | 0.53 | 0.58 | 0.55 | 0.59 | 0.50 | 0.57 | 0.52 | 0.58 | 0.53 | 0.48 | 0.55 | 0.54  | 0.59 | 0.52 | 0.56 | 0.56 | 0.60 |    |
| D24 | 0.48 | 0.52 | 0.47 | 0.53 | 0.50 | 0.55 | 0.46 | 0.54 | 0.46 | 0.50 | 0.61 | 0.41  | 0.50 | 0.52 | 0.59 | 0.51 | 0.59 |    |
| D25 | 0.52 | 0.53 | 0.47 | 0.52 | 0.51 | 0.55 | 0.51 | 0.58 | 0.51 | 0.58 | 0.61 | 0.51  | 0.56 | 0.52 | 0.59 | 0.46 | 0.55 |    |
| D26 | 0.41 | 0.51 | 0.42 | 0.54 | 0.41 | 0.58 | 0.54 | 0.57 | 0.53 | 0.55 | 0.63 | 0.56  | 0.60 | 0.52 | 0.56 | 0.56 | 0.62 |    |
| D27 | 0.47 | 0.54 | 0.55 | 0.55 | 0.51 | 0.54 | 0.52 | 0.58 | 0.47 | 0.55 | 0.59 | 0.40  | 0.55 | 0.41 | 0.56 | 0.55 | 0.63 |    |
| D28 | 0.47 | 0.58 | 0.52 | 0.60 | 0.50 | 0.58 | 0.46 | 0.58 | 0.51 | 0.59 | 0.61 | 0.51  | 0.61 | 0.52 | 0.58 | 0.52 | 0.59 |    |
| D29 | 0.53 | 0.57 | 0.53 | 0.58 | 0.42 | 0.55 | 0.45 | 0.52 | 0.45 | 0.54 | 0.56 | 0.46  | 0.55 | 0.52 | 0.59 | 0.51 | 0.61 |    |
| D30 | 0.47 | 0.51 | 0.47 | 0.58 | 0.52 | 0.55 | 0.47 | 0.53 | 0.52 | 0.54 | 0.61 | 0.49  | 0.55 | 0.51 | 0.55 | 0.56 | 0.60 |    |



Table S9: Accuracy measured by using  $t$ -test and ULR analysis.

| ID  | GD   |      | GDM  |      | GDA  |      | NM   |       | LM   |      | DNN  |      | BTE  |      | MVE  |      | NDTF |      |
|-----|------|------|------|------|------|------|------|-------|------|------|------|------|------|------|------|------|------|------|
|     | EF   | SF   | EF   | SF   | EF   | SF   | EF   | SF    | EF   | SF   | EF   | SF   | EF   | SF   | EF   | SF   | EF   | SF   |
| D1  | 63.4 | 67.9 | 58   | 64.6 | 57.6 | 66.4 | 63   | 67    | 67.4 | 69.9 | 63   | 68.6 | 61.6 | 66.9 | 60.2 | 69.3 | 64.6 | 69.6 |
| D2  | 63.2 | 69.4 | 59.3 | 64.0 | 58   | 63.9 | 56   | 62.61 | 63   | 69.9 | 59.8 | 62.3 | 62   | 66.7 | 59.6 | 61.3 | 63.6 | 69.8 |
| D3  | 64.2 | 69.6 | 58.9 | 61.2 | 61.2 | 66.3 | 63   | 66.6  | 62.2 | 66.6 | 59.9 | 64.2 | 56.8 | 60.6 | 62.2 | 66.7 | 60.4 | 66.3 |
| D4  | 63.6 | 66.9 | 56.8 | 60.9 | 62.2 | 66.7 | 61.2 | 66.6  | 60.3 | 63.4 | 66.2 | 69.9 | 56.6 | 60.2 | 61.3 | 63.6 | 61.6 | 67.6 |
| D6  | 60.2 | 63.4 | 52.6 | 60.2 | 62.3 | 66.6 | 60.3 | 62.6  | 61.3 | 67.6 | 61.3 | 69.9 | 56.6 | 62.2 | 60.4 | 64.6 | 61.6 | 66.3 |
| D6  | 63   | 69   | 61   | 69.9 | 56   | 62   | 56   | 64    | 60   | 64   | 59.9 | 65.1 | 56   | 59.9 | 61   | 64   | 63   | 64.8 |
| D7  | 59   | 69   | 63   | 65.9 | 61   | 64   | 55   | 60    | 61   | 69   | 60   | 66   | 58   | 61.9 | 60   | 63   | 62   | 65   |
| D8  | 59   | 63   | 56   | 60.9 | 62   | 69   | 64   | 69    | 63   | 69   | 66   | 69.9 | 52   | 66   | 62   | 66   | 66   | 68.1 |
| D9  | 64   | 69.8 | 58   | 61.9 | 60   | 64   | 61   | 64    | 63   | 66   | 62   | 66   | 61   | 66   | 63   | 67   | 66   | 69.9 |
| D10 | 56   | 62   | 54   | 61.9 | 64   | 69   | 61   | 69    | 52   | 66   | 64   | 69.4 | 56   | 66   | 61   | 69   | 62   | 68.9 |
| D11 | 66   | 69.9 | 56   | 60.9 | 61   | 62.8 | 56.9 | 66.2  | 59.2 | 62.2 | 57.9 | 64.1 | 58.9 | 62.2 | 61.1 | 68.1 | 62.1 | 69.1 |
| D12 | 66.2 | 69   | 58.1 | 62.3 | 58.1 | 66.1 | 53.2 | 64.1  | 56.2 | 66.1 | 59.1 | 66.1 | 58.1 | 60   | 62   | 66   | 57.6 | 67.9 |
| D13 | 63.8 | 69.1 | 61.1 | 68.2 | 56.9 | 66.1 | 56   | 66.1  | 56.2 | 66.1 | 59.1 | 67.1 | 56.9 | 63.1 | 60.2 | 66   | 61.1 | 62.3 |
| D14 | 60.6 | 66.8 | 59.9 | 62.2 | 59.3 | 68.4 | 60.4 | 68.8  | 61.8 | 67.9 | 58.6 | 69.2 | 56.4 | 67.8 | 54.3 | 63.3 | 52.8 | 64.9 |
| D15 | 61.2 | 67.3 | 67.2 | 69.2 | 61.8 | 63.9 | 59.6 | 66.9  | 62.9 | 66.9 | 62.8 | 67.8 | 66.9 | 69.3 | 64.9 | 68.9 | 66.9 | 69.9 |
| D16 | 58.2 | 69.3 | 56.1 | 60.3 | 61.2 | 66.8 | 57.1 | 61.6  | 60.9 | 66.9 | 61.7 | 63.9 | 56.8 | 60.8 | 61.2 | 65.9 | 61.2 | 66.4 |
| D17 | 59.4 | 68.9 | 56.3 | 63.9 | 60.3 | 64.2 | 60.9 | 66.8  | 59.9 | 66.9 | 61.8 | 67.9 | 56.8 | 64.8 | 58.3 | 63.3 | 59.7 | 67.8 |
| D18 | 56.2 | 62.3 | 56.8 | 62.9 | 58.8 | 66.8 | 61   | 68.1  | 60.8 | 67.9 | 61.8 | 67.3 | 62.8 | 68.2 | 63   | 68.8 | 63.1 | 69.8 |
| D19 | 58.9 | 68.9 | 61.2 | 68.9 | 63.2 | 69.3 | 58.9 | 67.3  | 62   | 68.3 | 63   | 68.9 | 59.8 | 65.8 | 62   | 68.1 | 63.1 | 69.9 |
| D20 | 59.2 | 64.1 | 60.2 | 66.6 | 61.9 | 68.1 | 58.8 | 66.2  | 63.1 | 69.3 | 58.9 | 69.9 | 63   | 67.2 | 63   | 69.8 | 63.8 | 69.3 |
| D21 | 61.2 | 67.2 | 58.9 | 68.9 | 62   | 67.2 | 58.9 | 63.1  | 62.1 | 69.8 | 63   | 69.2 | 66.9 | 69.1 | 58.8 | 68.1 | 59.2 | 68.2 |
| D22 | 58.1 | 62.2 | 59.2 | 69.2 | 63.3 | 69.2 | 57.3 | 64.2  | 63.1 | 66.9 | 61.2 | 67.1 | 60.8 | 68.1 | 62.2 | 67.6 | 62   | 69.9 |
| D23 | 59.1 | 66.2 | 58.6 | 69.1 | 61   | 68.2 | 58.6 | 69.1  | 59.8 | 66.8 | 59.2 | 67.1 | 58.9 | 66.2 | 58.9 | 66.8 | 59.8 | 69.8 |
| D24 | 64.2 | 68.7 | 60.2 | 69.9 | 61   | 66.9 | 60.7 | 69.1  | 56.9 | 66.7 | 61.9 | 69.3 | 59.6 | 66.1 | 62   | 68.1 | 61   | 68.2 |
| D25 | 59.0 | 69   | 58.9 | 66.1 | 59.6 | 63.9 | 58.9 | 68.2  | 60.8 | 69.2 | 62   | 69.8 | 61   | 68.8 | 62   | 68.7 | 62   | 69.6 |
| D26 | 58.9 | 62.8 | 58.6 | 66.2 | 60   | 68.7 | 62   | 69.1  | 62   | 68.9 | 61   | 69.8 | 61   | 67.8 | 62   | 69.8 | 61   | 69.7 |
| D27 | 58.0 | 69.2 | 57.8 | 68.2 | 60   | 66.9 | 60   | 66.8  | 60   | 66.9 | 62   | 67.6 | 60   | 69.1 | 63   | 68.9 | 61.8 | 69.6 |
| D28 | 64   | 69   | 61   | 69.8 | 61   | 67.1 | 60   | 68.6  | 62   | 68.2 | 63   | 69.7 | 66   | 69   | 63   | 69.6 | 62   | 68.6 |
| D29 | 58.9 | 62.6 | 58.9 | 62.2 | 58.9 | 66.4 | 60.4 | 66.6  | 62.6 | 69.6 | 61   | 66.1 | 59.6 | 62.6 | 61.9 | 68.9 | 61.8 | 69.9 |
| D30 | 63   | 69.8 | 62.2 | 69.2 | 61   | 68   | 60   | 66    | 62   | 66   | 63   | 69.1 | 63   | 68   | 62   | 66.3 | 61.9 | 69.0 |

Table S10: F-Measure measured by using  $t$ -test and ULR analysis.

| ID  | GD   |      | GDM  |             | GDA  |      | NM   |      | LM   |             | DNN  |             | BTE   |      | MVE  |      | NDTF |             |
|-----|------|------|------|-------------|------|------|------|------|------|-------------|------|-------------|-------|------|------|------|------|-------------|
|     | EF   | SF   | EF   | SF          | EF   | SF   | EF   | SF   | EF   | SF          | EF   | SF          | EF    | SF   | EF   | SF   | EF   | SF          |
| D1  | 0.60 | 0.67 | 0.61 | 0.68        | 0.6  | 0.67 | 0.60 | 0.68 | 0.6  | <b>0.71</b> | 0.60 | 0.66        | 0.61  | 0.67 | 0.60 | 0.68 | 0.61 | 0.67        |
| D2  | 0.62 | 0.67 | 0.61 | 0.67        | 0.62 | 0.66 | 0.61 | 0.66 | 0.6  | <b>0.71</b> | 0.61 | 0.67        | 0.61  | 0.69 | 0.60 | 0.68 | 0.61 | 0.69        |
| D3  | 0.60 | 0.68 | 0.61 | 0.68        | 0.61 | 0.67 | 0.6  | 0.67 | 0.61 | 0.68        | 0.61 | <b>0.70</b> | 0.62  | 0.69 | 0.61 | 0.69 | 0.61 | 0.68        |
| D4  | 0.62 | 0.67 | 0.64 | 0.68        | 0.63 | 0.67 | 0.6  | 0.68 | 0.61 | 0.67        | 0.6  | 0.66        | 0.60  | 0.68 | 0.60 | 0.69 | 0.61 | <b>0.70</b> |
| D5  | 0.61 | 0.68 | 0.6  | 0.66        | 0.6  | 0.66 | 0.61 | 0.68 | 0.61 | 0.66        | 0.6  | 0.69        | 0.61  | 0.69 | 0.63 | 0.66 | 0.66 | <b>0.71</b> |
| D6  | 0.61 | 0.65 | 0.6  | 0.66        | 0.63 | 0.68 | 0.6  | 0.67 | 0.6  | 0.68        | 0.67 | <b>0.73</b> | 0.67  | 0.69 | 0.62 | 0.68 | 0.66 | 0.70        |
| D7  | 0.60 | 0.67 | 0.67 | <b>0.69</b> | 0.6  | 0.67 | 0.6  | 0.66 | 0.6  | 0.67        | 0.61 | 0.68        | 0.60  | 0.68 | 0.61 | 0.68 | 0.60 | 0.68        |
| D8  | 0.62 | 0.67 | 0.62 | 0.68        | 0.65 | 0.68 | 0.62 | 0.68 | 0.61 | 0.67        | 0.66 | <b>0.72</b> | 0.62  | 0.68 | 0.63 | 0.67 | 0.66 | 0.70        |
| D9  | 0.6  | 0.67 | 0.61 | 0.68        | 0.6  | 0.67 | 0.6  | 0.68 | 0.61 | 0.68        | 0.62 | 0.69        | 0.64  | 0.69 | 0.62 | 0.69 | 0.63 | <b>0.70</b> |
| D10 | 0.62 | 0.68 | 0.6  | 0.67        | 0.62 | 0.68 | 0.6  | 0.67 | 0.61 | 0.68        | 0.62 | <b>0.70</b> | 0.62  | 0.67 | 0.61 | 0.68 | 0.61 | 0.69        |
| D11 | 0.6  | 0.66 | 0.62 | 0.66        | 0.6  | 0.68 | 0.61 | 0.63 | 0.6  | 0.67        | 0.61 | 0.68        | 0.61  | 0.69 | 0.61 | 0.67 | 0.63 | <b>0.71</b> |
| D12 | 0.6  | 0.66 | 0.62 | 0.67        | 0.6  | 0.67 | 0.61 | 0.65 | 0.61 | 0.68        | 0.60 | 0.67        | 0.61  | 0.69 | 0.62 | 0.67 | 0.67 | <b>0.70</b> |
| D13 | 0.62 | 0.70 | 0.61 | 0.68        | 0.60 | 0.68 | 0.60 | 0.67 | 0.61 | 0.66        | 0.62 | <b>0.76</b> | 0.63  | 0.72 | 0.60 | 0.71 | 0.61 | 0.72        |
| D14 | 0.61 | 0.66 | 0.6  | 0.65        | 0.62 | 0.68 | 0.65 | 0.68 | 0.61 | 0.65        | 0.65 | <b>0.72</b> | 0.66  | 0.71 | 0.66 | 0.70 | 0.69 | 0.69        |
| D15 | 0.62 | 0.68 | 0.66 | 0.68        | 0.61 | 0.68 | 0.67 | 0.68 | 0.63 | 0.66        | 0.62 | 0.70        | 0.67  | 0.69 | 0.66 | 0.67 | 0.66 | <b>0.76</b> |
| D16 | 0.60 | 0.67 | 0.62 | 0.68        | 0.60 | 0.66 | 0.60 | 0.65 | 0.66 | <b>0.71</b> | 0.61 | 0.69        | 0.61  | 0.69 | 0.61 | 0.66 | 0.60 | 0.69        |
| D17 | 0.61 | 0.68 | 0.61 | 0.67        | 0.61 | 0.67 | 0.61 | 0.67 | 0.61 | 0.65        | 0.60 | <b>0.72</b> | 0.62  | 0.68 | 0.61 | 0.69 | 0.67 | 0.71        |
| D18 | 0.61 | 0.68 | 0.61 | 0.67        | 0.62 | 0.68 | 0.62 | 0.68 | 0.67 | 0.68        | 0.62 | 0.70        | 0.67  | 0.71 | 0.62 | 0.71 | 0.67 | <b>0.73</b> |
| D19 | 0.60 | 0.68 | 0.61 | 0.70        | 0.66 | 0.7  | 0.61 | 0.7  | 0.65 | 0.61        | 0.61 | 0.7         | 0.68  | 0.67 | 0.66 | 0.69 | 0.66 | <b>0.71</b> |
| D20 | 0.61 | 0.66 | 0.63 | 0.68        | 0.65 | 0.68 | 0.64 | 0.7  | 0.62 | 0.66        | 0.65 | <b>0.72</b> | 0.616 | 0.71 | 0.66 | 0.71 | 0.62 | 0.69        |
| D21 | 0.62 | 0.67 | 0.62 | 0.63        | 0.62 | 0.66 | 0.6  | 0.67 | 0.61 | 0.69        | 0.63 | <b>0.72</b> | 0.671 | 0.69 | 0.61 | 0.68 | 0.61 | 0.66        |
| D22 | 0.61 | 0.65 | 0.6  | 0.66        | 0.6  | 0.66 | 0.65 | 0.68 | 0.6  | 0.62        | 0.60 | 0.69        | 0.61  | 0.68 | 0.60 | 0.67 | 0.61 | <b>0.71</b> |
| D23 | 0.63 | 0.68 | 0.66 | 0.7         | 0.62 | 0.67 | 0.6  | 0.67 | 0.63 | 0.67        | 0.69 | 0.67        | 0.66  | 0.69 | 0.62 | 0.67 | 0.67 | <b>0.70</b> |
| D24 | 0.62 | 0.65 | 0.62 | 0.66        | 0.62 | 0.65 | 0.6  | 0.66 | 0.65 | 0.69        | 0.60 | <b>0.71</b> | 0.61  | 0.69 | 0.62 | 0.69 | 0.61 | 0.69        |
| D25 | 0.62 | 0.65 | 0.62 | 0.67        | 0.61 | 0.66 | 0.63 | 0.66 | 0.61 | 0.69        | 0.62 | <b>0.71</b> | 0.61  | 0.67 | 0.62 | 0.69 | 0.67 | 0.70        |
| D26 | 0.61 | 0.67 | 0.6  | 0.65        | 0.61 | 0.67 | 0.62 | 0.66 | 0.61 | 0.66        | 0.68 | <b>0.73</b> | 0.67  | 0.70 | 0.62 | 0.67 | 0.67 | 0.72        |
| D27 | 0.60 | 0.65 | 0.66 | 0.69        | 0.62 | 0.65 | 0.60 | 0.68 | 0.65 | 0.66        | 0.60 | 0.69        | 0.60  | 0.66 | 0.61 | 0.67 | 0.66 | <b>0.73</b> |
| D28 | 0.60 | 0.68 | 0.62 | 0.7         | 0.62 | 0.68 | 0.65 | 0.67 | 0.6  | 0.68        | 0.60 | <b>0.71</b> | 0.61  | 0.70 | 0.62 | 0.68 | 0.62 | 0.69        |
| D29 | 0.60 | 0.67 | 0.65 | 0.7         | 0.60 | 0.65 | 0.65 | 0.67 | 0.67 | 0.68        | 0.60 | 0.67        | 0.60  | 0.66 | 0.62 | 0.69 | 0.61 | <b>0.71</b> |
| D30 | 0.62 | 0.65 | 0.61 | 0.68        | 0.6  | 0.66 | 0.62 | 0.65 | 0.6  | 0.65        | 0.63 | <b>0.73</b> | 0.62  | 0.68 | 0.61 | 0.68 | 0.62 | 0.70        |

**Table S11:** Accuracy measured by using Multivariate linear regression stepwise forward selection and Cross correlation analysis.

| ID  | GD   |      | GDM  |             | GDA  |      | NM   |       | LM   |             | DNN  |             | BTE  |      | MVE  |      | NDTF |             |
|-----|------|------|------|-------------|------|------|------|-------|------|-------------|------|-------------|------|------|------|------|------|-------------|
|     | EF   | SF   | EF   | SF          | EF   | SF   | EF   | SF    | EF   | SF          | EF   | SF          | EF   | SF   | EF   | SF   | EF   | SF          |
| D1  | 62.4 | 67.9 | 59.9 | 63.6        | 59.6 | 62.4 | 63.9 | 67.9  | 67.4 | 69.2        | 63   | 68.6        | 61.6 | 66.9 | 63.2 | 69.3 | 64.6 | 69.6        |
| D2  | 63.2 | 69.4 | 59.3 | 64.0        | 58   | 63.9 | 56   | 62.61 | 63   | 69.9        | 59.8 | <b>63.3</b> | 62   | 66.7 | 59.6 | 61.3 | 63.6 | 69.8        |
| D3  | 64.2 | 69.6 | 58.9 | 61.2        | 61.2 | 66.3 | 63   | 66.6  | 62.2 | 66.6        | 66.6 | <b>65.2</b> | 56.8 | 60.6 | 62.2 | 66.7 | 60.4 | 66.3        |
| D4  | 63.6 | 66.9 | 56.8 | 60.9        | 62.2 | 66.7 | 61.2 | 66.6  | 60.3 | 63.4        | 66.2 | 69.9        | 56.6 | 60.2 | 61.3 | 63.6 | 61.6 | <b>67.9</b> |
| D6  | 60.2 | 63.4 | 52.6 | 60.2        | 62.3 | 66.6 | 56.6 | 62.6  | 61.3 | 67.6        | 61.3 | 69.9        | 56.6 | 62.2 | 60.4 | 64.6 | 61.6 | <b>67.3</b> |
| D6  | 63   | 69   | 61   | 69.9        | 56   | 62   | 56   | 64    | 60   | 64          | 59.9 | <b>66.1</b> | 56   | 59.9 | 61   | 64   | 63   | 64.8        |
| D7  | 59   | 69   | 63   | <b>66.9</b> | 61   | 64   | 55   | 60    | 61   | 69          | 60   | 66          | 58   | 61.9 | 60   | 63   | 62   | 65          |
| D8  | 59   | 63   | 56   | 60.9        | 62   | 69   | 64   | 69    | 63   | 69          | 66   | <b>69.1</b> | 52   | 66   | 62   | 66   | 66   | 68.1        |
| D9  | 64   | 69.8 | 58   | 61.9        | 60   | 64   | 61   | 64    | 63   | 66          | 62   | 66          | 61   | 66   | 63   | 67   | 66   | <b>69.2</b> |
| D10 | 56   | 62   | 54   | 61.9        | 64   | 69   | 61   | 69    | 52   | 66          | 64   | <b>69.4</b> | 56   | 66   | 61   | 69   | 62   | 68.9        |
| D11 | 66   | 69.9 | 56   | 60.9        | 61   | 62.8 | 56.9 | 66.2  | 59.2 | 62.2        | 57.9 | 64.1        | 58.9 | 62.2 | 61.1 | 68.1 | 62.1 | <b>69.8</b> |
| D12 | 66.2 | 69   | 58.1 | 62.3        | 58.1 | 66.1 | 53.2 | 64.1  | 56.2 | 66.1        | 59.1 | 66.1        | 58.1 | 60   | 62   | 66   | 57.6 | <b>67.2</b> |
| D13 | 63.8 | 69.1 | 61.1 | 68.2        | 56.9 | 66.1 | 56   | 66.1  | 56.2 | 66.1        | 59.1 | <b>67.9</b> | 56.9 | 63.1 | 60.2 | 66   | 61.1 | 62.3        |
| D14 | 60.6 | 66.8 | 59.9 | 62.2        | 59.3 | 68.4 | 60.4 | 68.8  | 61.8 | 67.9        | 58.6 | <b>69.4</b> | 56.4 | 67.8 | 54.3 | 63.3 | 52.8 | 64.9        |
| D15 | 61.2 | 67.3 | 67.2 | 69.2        | 61.8 | 63.9 | 59.6 | 66.9  | 62.9 | 66.9        | 62.8 | 67.8        | 66.9 | 69.3 | 64.9 | 68.9 | 66.9 | <b>69.3</b> |
| D16 | 58.2 | 69.3 | 56.1 | 60.3        | 61.2 | 66.8 | 57.1 | 61.6  | 60.9 | <b>68.9</b> | 61.7 | 63.9        | 56.8 | 60.8 | 61.2 | 65.9 | 61.2 | 66.4        |
| D17 | 59.6 | 68.9 | 56.3 | 63.9        | 60.3 | 64.2 | 60.9 | 66.8  | 59.9 | 66.9        | 61.8 | <b>67.9</b> | 56.8 | 64.8 | 58.3 | 63.3 | 59.7 | 67.8        |
| D18 | 56.9 | 62.3 | 56.8 | 62.9        | 58.8 | 66.8 | 61   | 68.1  | 60.8 | 67.9        | 61.8 | 67.3        | 62.8 | 68.2 | 63   | 68.8 | 63.1 | <b>69.8</b> |
| D19 | 58.9 | 68.9 | 61.2 | 68.9        | 63.2 | 69.3 | 58.9 | 67.3  | 62   | 68.3        | 63   | 68.9        | 59.8 | 65.8 | 62   | 68.1 | 63.1 | <b>69.2</b> |
| D20 | 59.9 | 64.1 | 60.2 | 66.6        | 61.9 | 68.1 | 58.8 | 66.2  | 63.1 | 69.3        | 58.9 | <b>69.8</b> | 63   | 67.2 | 63   | 69.8 | 63.8 | 69.3        |
| D21 | 61.7 | 67.2 | 58.9 | 68.9        | 62   | 67.2 | 58.9 | 63.1  | 62.1 | 69.8        | 63   | <b>69.8</b> | 66.9 | 69.1 | 58.8 | 68.1 | 59.2 | 68.2        |
| D22 | 58.9 | 62.2 | 59.2 | 69.2        | 63.3 | 69.2 | 57.3 | 64.2  | 63.1 | 66.9        | 61.2 | 67.1        | 60.8 | 68.1 | 62.2 | 67.6 | 62   | <b>69.8</b> |
| D23 | 61.2 | 66.2 | 58.6 | 69.1        | 61   | 68.2 | 58.6 | 69.1  | 59.8 | 66.8        | 59.2 | 67.1        | 58.9 | 66.2 | 58.9 | 66.8 | 59.8 | <b>69.2</b> |
| D24 | 63.8 | 68.7 | 60.2 | 69.9        | 61   | 66.9 | 60.7 | 69.1  | 56.9 | 66.7        | 61.9 | <b>69.3</b> | 59.6 | 66.1 | 62   | 68.1 | 61   | 68.2        |
| D25 | 61.2 | 69   | 58.9 | 66.1        | 59.6 | 63.9 | 58.9 | 68.2  | 60.8 | 69.2        | 62   | <b>69.9</b> | 61   | 68.8 | 62   | 68.7 | 62   | 69.6        |
| D26 | 59.9 | 62.8 | 58.6 | 66.2        | 60   | 68.7 | 62   | 69.1  | 62   | 68.9        | 61   | <b>69.3</b> | 61   | 67.8 | 62   | 69.1 | 61   | 69.1        |
| D27 | 58.8 | 69.2 | 57.8 | 68.2        | 60   | 66.9 | 60   | 66.8  | 60   | 66.9        | 62   | 67.6        | 60   | 69.1 | 63   | 68.9 | 61.8 | <b>69.9</b> |
| D28 | 64.8 | 69   | 61   | 69.2        | 61   | 67.1 | 60   | 68.6  | 62   | 68.2        | 63   | <b>69.9</b> | 66   | 69   | 63   | 69.6 | 62   | 68.6        |
| D29 | 58.8 | 62.6 | 58.9 | 62.2        | 58.9 | 66.4 | 60.4 | 66.6  | 62.6 | 69.6        | 61   | 66.1        | 59.6 | 62.6 | 61.9 | 67.9 | 61.8 | <b>69.8</b> |
| D30 | 63.2 | 69.8 | 62.2 | 69.2        | 61   | 68   | 60   | 66    | 62   | 66          | 63   | <b>69.8</b> | 63   | 68   | 62   | 66.3 | 61.9 | 69.0        |

**Table S12:** F-Measure measured by using Multivariate linear regression stepwise forward selection and Cross correlation analysis.

| ID  | GD   |      | GDM  |             | GDA  |      | NM   |      | LM   |             | DNN         |             | MVE  |      | NDTF |             |
|-----|------|------|------|-------------|------|------|------|------|------|-------------|-------------|-------------|------|------|------|-------------|
|     | EF   | SF   | EF   | SF          | EF   | SF   | EF   | SF   | EF   | SF          | EF          | SF          | EF   | SF   | EF   | SF          |
| D1  | 0.63 | 0.67 | 0.61 | 0.67        | 0.62 | 0.67 | 0.62 | 0.67 | 0.60 | <b>0.73</b> | 0.60        | 0.66        | 0.61 | 0.67 | 0.60 | 0.68        |
| D2  | 0.65 | 0.67 | 0.61 | 0.67        | 0.60 | 0.65 | 0.62 | 0.66 | 0.60 | <b>0.73</b> | 0.61        | 0.67        | 0.61 | 0.69 | 0.60 | 0.68        |
| D3  | 0.64 | 0.68 | 0.63 | 0.67        | 0.63 | 0.66 | 0.62 | 0.67 | 0.62 | 0.67        | <b>0.71</b> | 0.62        | 0.69 | 0.61 | 0.69 | 0.68        |
| D4  | 0.61 | 0.66 | 0.62 | 0.66        | 0.6  | 0.66 | 0.62 | 0.67 | 0.62 | 0.67        | 0.6         | 0.65        | 0.60 | 0.68 | 0.60 | <b>0.72</b> |
| D5  | 0.62 | 0.66 | 0.61 | 0.65        | 0.6  | 0.66 | 0.61 | 0.67 | 0.61 | 0.67        | 0.61        | 0.69        | 0.61 | 0.69 | 0.63 | <b>0.70</b> |
| D6  | 0.63 | 0.65 | 0.62 | 0.66        | 0.62 | 0.67 | 0.62 | 0.66 | 0.62 | 0.68        | <b>0.72</b> | 0.67        | 0.69 | 0.62 | 0.68 | 0.70        |
| D7  | 0.61 | 0.67 | 0.66 | <b>0.71</b> | 0.62 | 0.67 | 0.62 | 0.68 | 0.61 | 0.68        | 0.61        | 0.68        | 0.60 | 0.68 | 0.61 | 0.68        |
| D8  | 0.61 | 0.67 | 0.62 | 0.68        | 0.65 | 0.68 | 0.62 | 0.68 | 0.63 | 0.67        | <b>0.71</b> | 0.62        | 0.68 | 0.63 | 0.67 | 0.70        |
| D9  | 0.61 | 0.67 | 0.61 | 0.68        | 0.62 | 0.67 | 0.60 | 0.67 | 0.61 | 0.68        | 0.62        | 0.69        | 0.64 | 0.69 | 0.62 | <b>0.71</b> |
| D10 | 0.6  | 0.68 | 0.6  | 0.67        | 0.62 | 0.68 | 0.62 | 0.67 | 0.61 | 0.68        | <b>0.71</b> | 0.62        | 0.67 | 0.61 | 0.68 | 0.69        |
| D11 | 0.61 | 0.66 | 0.62 | 0.66        | 0.62 | 0.68 | 0.61 | 0.63 | 0.60 | 0.67        | 0.68        | 0.61        | 0.69 | 0.61 | 0.67 | <b>0.70</b> |
| D12 | 0.62 | 0.66 | 0.60 | 0.67        | 0.60 | 0.67 | 0.61 | 0.65 | 0.61 | 0.68        | 0.61        | 0.68        | 0.61 | 0.69 | 0.62 | <b>0.71</b> |
| D13 | 0.62 | 0.71 | 0.61 | 0.68        | 0.62 | 0.68 | 0.62 | 0.67 | 0.61 | 0.66        | <b>0.75</b> | 0.63        | 0.72 | 0.60 | 0.71 | 0.61        |
| D14 | 0.63 | 0.66 | 0.62 | 0.68        | 0.62 | 0.68 | 0.67 | 0.68 | 0.61 | 0.66        | <b>0.72</b> | 0.66        | 0.71 | 0.66 | 0.70 | 0.69        |
| D15 | 0.62 | 0.67 | 0.66 | 0.67        | 0.63 | 0.66 | 0.65 | 0.67 | 0.63 | 0.64        | 0.62        | 0.71        | 0.67 | 0.69 | 0.66 | <b>0.76</b> |
| D16 | 0.63 | 0.67 | 0.62 | 0.68        | 0.62 | 0.66 | 0.60 | 0.65 | 0.66 | <b>0.72</b> | 0.61        | 0.69        | 0.61 | 0.69 | 0.61 | 0.69        |
| D17 | 0.61 | 0.68 | 0.61 | 0.67        | 0.61 | 0.67 | 0.60 | 0.67 | 0.61 | 0.65        | <b>0.71</b> | 0.62        | 0.68 | 0.61 | 0.69 | 0.70        |
| D18 | 0.61 | 0.68 | 0.61 | 0.67        | 0.6  | 0.68 | 0.6  | 0.68 | 0.67 | 0.68        | 0.62        | 0.72        | 0.67 | 0.71 | 0.67 | <b>0.72</b> |
| D19 | 0.6  | 0.68 | 0.61 | 0.7         | 0.66 | 0.7  | 0.61 | 0.7  | 0.65 | 0.61        | 0.7         | 0.7         | 0.61 | 0.68 | 0.66 | <b>0.71</b> |
| D20 | 0.62 | 0.67 | 0.60 | 0.68        | 0.60 | 0.68 | 0.62 | 0.7  | 0.61 | 0.66        | <b>0.72</b> | 0.616       | 0.71 | 0.66 | 0.71 | 0.62        |
| D21 | 0.62 | 0.67 | 0.6  | 0.61        | 0.6  | 0.66 | 0.6  | 0.67 | 0.61 | 0.68        | <b>0.72</b> | 0.671       | 0.69 | 0.61 | 0.68 | 0.66        |
| D22 | 0.61 | 0.66 | 0.62 | 0.68        | 0.62 | 0.66 | 0.67 | 0.68 | 0.60 | 0.62        | 0.60        | 0.69        | 0.61 | 0.68 | 0.60 | <b>0.71</b> |
| D23 | 0.61 | 0.68 | 0.66 | 0.69        | 0.6  | 0.67 | 0.6  | 0.68 | 0.61 | 0.66        | 0.67        | 0.67        | 0.66 | 0.62 | 0.67 | <b>0.70</b> |
| D24 | 0.61 | 0.66 | 0.6  | 0.67        | 0.6  | 0.66 | 0.6  | 0.66 | 0.65 | 0.68        | 0.61        | <b>0.71</b> | 0.61 | 0.69 | 0.62 | 0.69        |
| D25 | 0.60 | 0.67 | 0.62 | 0.67        | 0.61 | 0.68 | 0.61 | 0.66 | 0.61 | 0.68        | <b>0.71</b> | 0.61        | 0.67 | 0.62 | 0.69 | 0.70        |
| D26 | 0.61 | 0.68 | 0.62 | 0.67        | 0.61 | 0.68 | 0.64 | 0.67 | 0.61 | 0.68        | <b>0.73</b> | 0.67        | 0.70 | 0.62 | 0.67 | 0.72        |
| D27 | 0.61 | 0.67 | 0.66 | 0.69        | 0.61 | 0.65 | 0.62 | 0.68 | 0.65 | 0.66        | 0.62        | 0.68        | 0.60 | 0.66 | 0.61 | <b>0.73</b> |
| D28 | 0.61 | 0.68 | 0.62 | 0.7         | 0.62 | 0.68 | 0.65 | 0.68 | 0.61 | 0.69        | <b>0.71</b> | 0.61        | 0.70 | 0.62 | 0.68 | 0.69        |
| D29 | 0.62 | 0.67 | 0.67 | 0.7         | 0.62 | 0.65 | 0.65 | 0.67 | 0.65 | 0.68        | 0.61        | 0.67        | 0.66 | 0.62 | 0.69 | <b>0.71</b> |
| D30 | 0.61 | 0.65 | 0.61 | 0.68        | 0.6  | 0.66 | 0.61 | 0.65 | 0.6  | 0.65        | <b>0.73</b> | 0.62        | 0.68 | 0.61 | 0.68 | 0.70        |

Table S13: Accuracy measured by using Cross correlation analysis,  $t$ -test and ULR analysis.

| ID  | GD   |      | GDM  |      | GDA  |      | NM   |       | LM   |      | DNN  |      | BTE  |      | MVE  |      | NDTF |      |
|-----|------|------|------|------|------|------|------|-------|------|------|------|------|------|------|------|------|------|------|
|     | EF   | SF   | EF   | SF   | EF   | SF   | EF   | SF    | EF   | SF   | EF   | SF   | EF   | SF   | EF   | SF   | EF   | SF   |
| D1  | 72.4 | 77.9 | 69.9 | 73.7 | 69.7 | 72.4 | 73.9 | 77.9  | 77.4 | 79.2 | 73   | 78.7 | 71.7 | 77.9 | 73.2 | 79.3 | 74.7 | 79.1 |
| D2  | 73.2 | 79.4 | 69.3 | 74.0 | 68   | 73.9 | 67   | 72.71 | 73   | 79.9 | 69.8 | 79.9 | 72   | 77.7 | 69.7 | 71.3 | 73.7 | 79.8 |
| D3  | 74.2 | 79.7 | 68.9 | 71.2 | 71.2 | 77.3 | 73   | 77.7  | 72.2 | 77.7 | 69.9 | 78.2 | 67.8 | 70.7 | 72.2 | 77.7 | 70.4 | 77.3 |
| D4  | 73.7 | 77.9 | 67.8 | 70.9 | 72.2 | 77.7 | 71.2 | 77.7  | 70.3 | 73.4 | 77.2 | 79.9 | 67.7 | 70.2 | 71.3 | 73.7 | 71.7 | 78.9 |
| D7  | 70.2 | 73.4 | 62.7 | 70.2 | 72.3 | 77.7 | 62.7 | 72.7  | 71.3 | 77.7 | 71.3 | 78.9 | 67.7 | 72.2 | 70.4 | 74.7 | 71.7 | 79.3 |
| D7  | 73   | 79   | 71   | 79.2 | 67   | 72   | 67   | 74    | 70   | 74   | 69.9 | 79.9 | 67   | 69.9 | 71   | 74   | 73   | 74.8 |
| D7  | 69   | 79   | 73   | 77.9 | 71   | 74   | 66   | 70    | 71   | 79   | 70   | 77   | 68   | 71.9 | 70   | 73   | 72   | 76   |
| D8  | 69   | 73   | 67   | 70.9 | 72   | 79   | 74   | 79    | 77   | 79   | 77   | 79.1 | 62   | 77   | 72   | 77   | 77   | 78.1 |
| D9  | 74   | 79.8 | 68   | 71.9 | 70   | 74   | 71   | 74    | 73   | 77   | 72   | 77   | 71   | 77   | 73   | 77   | 77   | 79.2 |
| D10 | 67   | 72   | 64   | 71.9 | 74   | 79   | 71   | 79    | 62   | 77   | 74   | 79.4 | 67   | 77   | 71   | 79   | 72   | 78.9 |
| D11 | 77   | 79.9 | 67   | 70.9 | 71   | 72.8 | 67.9 | 77.2  | 69.2 | 72.2 | 67.9 | 74.1 | 68.9 | 72.2 | 71.1 | 78.1 | 72.1 | 79.8 |
| D12 | 77.2 | 79   | 68.1 | 72.3 | 68.1 | 77.1 | 63.2 | 74.1  | 67.2 | 77.1 | 69.1 | 77.1 | 68.1 | 70   | 72   | 77   | 67.7 | 77.2 |
| D13 | 73.8 | 79.1 | 71.1 | 78.2 | 67.9 | 77.1 | 67   | 77.1  | 67.2 | 77.1 | 69.1 | 77.9 | 67.9 | 73.1 | 70.2 | 77   | 71.1 | 72.3 |
| D14 | 70.7 | 77.8 | 69.9 | 72.2 | 69.3 | 78.4 | 70.4 | 78.8  | 71.8 | 77.9 | 68.7 | 79.4 | 67.4 | 77.8 | 64.3 | 73.3 | 62.8 | 74.9 |
| D15 | 71.2 | 77.3 | 77.2 | 79.2 | 71.8 | 73.9 | 69.7 | 77.9  | 72.9 | 77.9 | 72.8 | 77.8 | 77.9 | 79.3 | 74.9 | 78.9 | 77.9 | 79.3 |
| D16 | 68.2 | 79.3 | 67.1 | 70.3 | 71.2 | 77.8 | 67.1 | 71.7  | 70.9 | 78.9 | 71.7 | 73.9 | 67.8 | 70.8 | 71.2 | 76.9 | 71.2 | 77.4 |
| D17 | 69.7 | 78.9 | 67.3 | 73.9 | 70.3 | 74.2 | 70.9 | 77.8  | 69.9 | 77.9 | 71.8 | 77.9 | 67.8 | 74.8 | 68.3 | 73.3 | 69.7 | 77.8 |
| D18 | 67.9 | 72.3 | 67.8 | 72.9 | 68.8 | 77.8 | 71   | 78.1  | 70.8 | 77.9 | 71.8 | 77.3 | 72.8 | 78.2 | 73   | 78.8 | 73.1 | 79.8 |
| D19 | 68.9 | 78.9 | 71.2 | 78.9 | 73.2 | 79.3 | 68.9 | 77.3  | 72   | 78.3 | 73   | 78.9 | 69.8 | 76.8 | 72   | 78.1 | 73.1 | 79.2 |
| D20 | 69.9 | 74.1 | 70.2 | 77.7 | 71.9 | 78.1 | 68.8 | 77.2  | 73.1 | 79.3 | 68.9 | 79.8 | 73   | 77.2 | 73   | 79.8 | 73.8 | 79.3 |
| D21 | 71.7 | 77.2 | 68.9 | 78.9 | 72   | 77.2 | 68.9 | 73.1  | 72.1 | 79.8 | 73   | 79.8 | 77.9 | 79.1 | 68.8 | 78.1 | 69.2 | 78.2 |
| D22 | 68.9 | 72.2 | 69.2 | 79.2 | 73.3 | 79.2 | 67.3 | 74.2  | 73.1 | 77.9 | 71.2 | 77.1 | 70.8 | 78.1 | 72.2 | 77.7 | 72   | 79.8 |
| D23 | 71.2 | 77.2 | 68.7 | 79.1 | 71   | 78.2 | 68.7 | 79.1  | 69.8 | 77.8 | 69.2 | 77.1 | 68.9 | 77.2 | 68.9 | 77.8 | 69.8 | 79.2 |
| D24 | 73.8 | 78.7 | 70.2 | 79.9 | 71   | 77.9 | 70.7 | 79.1  | 67.9 | 77.7 | 71.9 | 79.3 | 69.7 | 77.1 | 72   | 78.1 | 71   | 78.2 |
| D25 | 71.2 | 79   | 68.9 | 77.1 | 69.7 | 73.9 | 68.9 | 78.2  | 70.8 | 79.2 | 72   | 79.9 | 71   | 78.8 | 72   | 78.7 | 72   | 79.7 |
| D26 | 69.9 | 72.8 | 68.7 | 77.2 | 70   | 78.7 | 72   | 79.1  | 72   | 78.9 | 71   | 79.3 | 71   | 77.8 | 72   | 79.1 | 71   | 79.1 |
| D27 | 68.8 | 79.2 | 67.8 | 78.2 | 70   | 77.9 | 70   | 77.8  | 70   | 77.9 | 72   | 77.7 | 70   | 79.1 | 73   | 78.9 | 71.8 | 79.9 |
| D28 | 74.8 | 79   | 71   | 79.2 | 71   | 77.1 | 70   | 78.7  | 72   | 78.2 | 73   | 79.9 | 77   | 79   | 73   | 79.7 | 72   | 78.7 |
| D29 | 68.8 | 72.7 | 68.9 | 72.2 | 68.9 | 77.4 | 70.4 | 77.7  | 72.7 | 79.7 | 71   | 77.1 | 69.7 | 72.7 | 71.9 | 77.9 | 71.8 | 79.8 |
| D30 | 73.2 | 79.8 | 72.2 | 79.2 | 71   | 78   | 70   | 77    | 72   | 77   | 73   | 79.8 | 73   | 78   | 72   | 77.3 | 71.9 | 79.0 |

Table S14: F-Measure measured by using Cross correlation analysis,  $t$ -test and ULR analysis.

| ID  | GD   |      | GDM  |      | GDA  |      | NM   |      | LM   |      | DNN  |      | BTE   |      | MVE  |      | NDTF |      |
|-----|------|------|------|------|------|------|------|------|------|------|------|------|-------|------|------|------|------|------|
|     | EF   | SF   | EF   | SF   | EF   | SF   | EF   | SF   | EF   | SF   | EF   | SF   | EF    | SF   | EF   | SF   | EF   | SF   |
| D1  | 0.73 | 0.77 | 0.71 | 0.78 | 0.70 | 0.78 | 0.72 | 0.78 | 0.7  | 0.83 | 0.70 | 0.77 | 0.71  | 0.78 | 0.70 | 0.78 | 0.71 | 0.78 |
| D2  | 0.73 | 0.77 | 0.71 | 0.77 | 0.7  | 0.77 | 0.71 | 0.77 | 0.7  | 0.83 | 0.71 | 0.78 | 0.71  | 0.79 | 0.70 | 0.78 | 0.71 | 0.79 |
| D3  | 0.72 | 0.78 | 0.71 | 0.78 | 0.71 | 0.77 | 0.7  | 0.77 | 0.71 | 0.79 | 0.71 | 0.81 | 0.72  | 0.79 | 0.71 | 0.79 | 0.71 | 0.78 |
| D4  | 0.71 | 0.77 | 0.72 | 0.78 | 0.71 | 0.77 | 0.7  | 0.78 | 0.71 | 0.77 | 0.7  | 0.78 | 0.70  | 0.78 | 0.70 | 0.79 | 0.71 | 0.82 |
| D5  | 0.72 | 0.78 | 0.71 | 0.77 | 0.7  | 0.77 | 0.73 | 0.78 | 0.71 | 0.78 | 0.71 | 0.79 | 0.71  | 0.79 | 0.73 | 0.77 | 0.77 | 0.80 |
| D6  | 0.71 | 0.76 | 0.7  | 0.77 | 0.73 | 0.78 | 0.70 | 0.77 | 0.70 | 0.79 | 0.78 | 0.82 | 0.79  | 0.72 | 0.78 | 0.77 | 0.77 | 0.80 |
| D7  | 0.71 | 0.77 | 0.77 | 0.81 | 0.7  | 0.77 | 0.7  | 0.77 | 0.72 | 0.77 | 0.71 | 0.78 | 0.70  | 0.78 | 0.71 | 0.78 | 0.70 | 0.78 |
| D8  | 0.71 | 0.77 | 0.72 | 0.78 | 0.76 | 0.78 | 0.72 | 0.78 | 0.71 | 0.76 | 0.77 | 0.81 | 0.72  | 0.78 | 0.73 | 0.78 | 0.77 | 0.80 |
| D9  | 0.71 | 0.77 | 0.71 | 0.78 | 0.72 | 0.77 | 0.7  | 0.78 | 0.71 | 0.79 | 0.73 | 0.79 | 0.74  | 0.79 | 0.72 | 0.79 | 0.73 | 0.81 |
| D10 | 0.72 | 0.78 | 0.7  | 0.77 | 0.72 | 0.78 | 0.7  | 0.77 | 0.71 | 0.78 | 0.72 | 0.81 | 0.72  | 0.78 | 0.71 | 0.78 | 0.71 | 0.79 |
| D11 | 0.71 | 0.77 | 0.70 | 0.77 | 0.70 | 0.78 | 0.71 | 0.73 | 0.70 | 0.78 | 0.72 | 0.78 | 0.71  | 0.79 | 0.71 | 0.78 | 0.73 | 0.80 |
| D12 | 0.72 | 0.77 | 0.70 | 0.77 | 0.70 | 0.77 | 0.71 | 0.76 | 0.71 | 0.78 | 0.71 | 0.78 | 0.71  | 0.79 | 0.72 | 0.78 | 0.78 | 0.81 |
| D13 | 0.70 | 0.81 | 0.71 | 0.78 | 0.7  | 0.78 | 0.72 | 0.77 | 0.71 | 0.77 | 0.72 | 0.85 | 0.73  | 0.82 | 0.70 | 0.81 | 0.71 | 0.82 |
| D14 | 0.71 | 0.77 | 0.72 | 0.77 | 0.74 | 0.78 | 0.76 | 0.78 | 0.71 | 0.76 | 0.76 | 0.82 | 0.77  | 0.81 | 0.77 | 0.80 | 0.79 | 0.79 |
| D15 | 0.72 | 0.78 | 0.77 | 0.78 | 0.71 | 0.77 | 0.76 | 0.78 | 0.71 | 0.78 | 0.71 | 0.81 | 0.78  | 0.79 | 0.77 | 0.78 | 0.77 | 0.87 |
| D16 | 0.73 | 0.77 | 0.72 | 0.78 | 0.70 | 0.77 | 0.72 | 0.76 | 0.77 | 0.82 | 0.71 | 0.79 | 0.71  | 0.79 | 0.71 | 0.77 | 0.70 | 0.79 |
| D17 | 0.71 | 0.78 | 0.71 | 0.77 | 0.71 | 0.77 | 0.71 | 0.77 | 0.71 | 0.77 | 0.71 | 0.81 | 0.72  | 0.78 | 0.71 | 0.79 | 0.78 | 0.80 |
| D18 | 0.71 | 0.78 | 0.73 | 0.77 | 0.72 | 0.78 | 0.72 | 0.78 | 0.76 | 0.78 | 0.73 | 0.82 | 0.78  | 0.81 | 0.72 | 0.81 | 0.78 | 0.82 |
| D19 | 0.70 | 0.78 | 0.71 | 0.80 | 0.77 | 0.78 | 0.71 | 0.8  | 0.76 | 0.71 | 0.72 | 0.8  | 0.71  | 0.78 | 0.77 | 0.79 | 0.77 | 0.81 |
| D20 | 0.72 | 0.77 | 0.70 | 0.78 | 0.70 | 0.78 | 0.74 | 0.8  | 0.72 | 0.77 | 0.7  | 0.82 | 0.717 | 0.81 | 0.77 | 0.81 | 0.72 | 0.79 |
| D21 | 0.72 | 0.77 | 0.7  | 0.7  | 0.7  | 0.76 | 0.7  | 0.7  | 0.7  | 0.79 | 0.78 | 0.82 | 0.781 | 0.79 | 0.71 | 0.78 | 0.71 | 0.77 |
| D22 | 0.71 | 0.77 | 0.7  | 0.78 | 0.7  | 0.77 | 0.76 | 0.78 | 0.72 | 0.72 | 0.70 | 0.79 | 0.71  | 0.78 | 0.70 | 0.78 | 0.71 | 0.81 |
| D23 | 0.71 | 0.78 | 0.77 | 0.8  | 0.7  | 0.77 | 0.77 | 0.77 | 0.76 | 0.77 | 0.78 | 0.78 | 0.77  | 0.79 | 0.72 | 0.78 | 0.78 | 0.80 |
| D24 | 0.72 | 0.76 | 0.7  | 0.7  | 0.7  | 0.76 | 0.73 | 0.77 | 0.76 | 0.78 | 0.70 | 0.81 | 0.71  | 0.79 | 0.72 | 0.79 | 0.71 | 0.79 |
| D25 | 0.7  | 0.75 | 0.7  | 0.75 | 0.71 | 0.77 | 0.7  | 0.76 | 0.71 | 0.78 | 0.71 | 0.81 | 0.71  | 0.78 | 0.72 | 0.79 | 0.78 | 0.80 |
| D26 | 0.71 | 0.73 | 0.7  | 0.7  | 0.7  | 0.75 | 0.72 | 0.77 | 0.7  | 0.76 | 0.77 | 0.83 | 0.78  | 0.80 | 0.72 | 0.78 | 0.78 | 0.82 |
| D27 | 0.71 | 0.75 | 0.77 | 0.70 | 0.7  | 0.76 | 0.72 | 0.77 | 0.77 | 0.78 | 0.71 | 0.79 | 0.70  | 0.77 | 0.71 | 0.78 | 0.77 | 0.83 |
| D28 | 0.71 | 0.7  | 0.7  | 0.8  | 0.7  | 0.77 | 0.76 | 0.78 | 0.70 | 0.79 | 0.71 | 0.81 | 0.71  | 0.80 | 0.72 | 0.78 | 0.72 | 0.79 |
| D29 | 0.71 | 0.76 | 0.75 | 0.8  | 0.7  | 0.75 | 0.76 | 0.77 | 0.78 | 0.79 | 0.71 | 0.78 | 0.70  | 0.77 | 0.72 | 0.79 | 0.71 | 0.81 |
| D30 | 0.71 | 0.76 | 0.71 | 0.75 | 0.70 | 0.75 | 0.7  | 0.7  | 0.7  | 0.77 | 0.74 | 0.83 | 0.72  | 0.78 | 0.71 | 0.78 | 0.72 | 0.80 |
